# Supplementary material for: Treatment of Pheochromocytoma Cells with Recurrent Cycles of Hypoxia: A New Pseudohypoxic In Vitro Model
Source: Cells. 2022 Feb 5;11(3):560. doi: 10.3390/cells11030560 (PMC8834104; doi:10.3390/cells11030560)
Supplement: Supplementary file 1 [file cells-11-00560-s001.zip]

Archive with 4 entries (4 files):
- Supporting information_1_Rev copy.pdf
- Supporting information_2.xlsx
- Supporting information_3.xlsx
- Supporting information_4.xlsx
