# Supplementary material for: Treatment of Pheochromocytoma Cells with Recurrent Cycles of Hypoxia: A New Pseudohypoxic In Vitro Model
Source: Cells. 2022 Feb 5;11(3):560. doi: 10.3390/cells11030560 (PMC8834104; doi:10.3390/cells11030560)
Supplement: Supplementary file 1 [file cells-11-00560-s001.zip › Supporting information_2.xlsx]

## Sheet: Sheet1
Geneid	PC12 Z20 control_1	PC12 Z20 control_2	PC12 Z20 control_3	PC12 Z20_1	PC12 Z20_2	PC12 Z20_3	Length	Geneid
Plagl1	0.0283094	0.227672	0.0956651	0.839878	1.80041	2.86699	4642	Plagl1
Nhsl1	4.55131	5.37847	4.71928	18.0146	15.0711	14.0137	5545	Nhsl1
Ehd2	28.2872	47.8784	33.8334	52.9396	58.9851	64.1239	2027	Ehd2
Adm	19.0439	15.8132	16.9483	26.7002	24.0535	20.0032	1387	Adm
Ifitm1	1.61261	2.62636	2.14832	3.2418	6.14113	8.04251	568	Ifitm1
Ifitm3	7.09925	10.0306	8.87126	13.4587	18.8955	27.3096	700	Ifitm3
Vcan	0.22076	0.220549	0.30717	1.56997	2.10745	2.41125	11553	Vcan
Thbs4	2.27356	2.72	2.97788	6.35391	6.37406	6.74035	3221	Thbs4
Postn	0.000202475	0.000192416	0.000171695	0.754691	0.774584	0.943207	3229	Postn
Kcnd3	14.2592	10.8626	12.4494	18.0578	16.108	18.1295	6818	Kcnd3
Vav3	2.43235	2.90193	2.66789	3.4592	6.66547	7.27402	4946	Vav3
Arhgap29	17.7978	14.0499	16.6293	21.1556	23.9219	29.2357	5771	Arhgap29
Alpk1	1.50787	1.27786	1.19956	2.25273	2.06519	1.75638	8412	Alpk1
Ptprz1	0.557813	0.363975	0.705958	3.28136	3.86241	3.42482	7854	Ptprz1
Cxcl12	2.25458	1.83323	2.19809	2.79552	3.47041	3.47313	5423	Cxcl12
Ppfibp1	24.5253	22.7376	24.3641	26.7699	33.3052	36.5672	5129	Ppfibp1
Thbs1	37.3137	36.7009	34.8722	59.6074	54.7481	61.3116	3655	Thbs1
Pltp	10.8161	13.9607	11.5812	21.5766	26.6785	27.318	2025	Pltp
Sulf2	48.1883	54.6256	50.8294	88.3366	144.553	166.858	4172	Sulf2
Tpm2	0.702497	1.00119	1.04221	3.1253	1.8111	1.66558	1490	Tpm2
Bnc2	1.52888	1.9889	1.56076	2.27393	2.79356	3.45649	4405	Bnc2
Pde4b	0.079542	0.0755905	0.101091	0.24656	0.439412	1.16355	3296	Pde4b
Slc2a1	20.7844	28.2134	22.1165	42.4652	53.8705	59.0225	2592	Slc2a1
Slitrk2	0.665772	0.632697	0.639813	2.35176	2.23307	1.87539	2947	Slitrk2
Matn3	0.751436	0.652037	0.415665	3.40776	5.71938	6.70397	2002	Matn3
Egln3	13.5078	15.4613	15.2527	19.508	22.2846	23.7412	2817	Egln3
Dact1	2.19026	2.84286	1.44965	4.97644	4.16665	4.42297	2448	Dact1
Akap5	3.99564	2.3244	3.2445	8.06123	6.28798	8.35426	2700	Akap5
Gli1	1.82603	2.10145	1.91776	3.13514	3.38889	2.6152	3903	Gli1
Zfpm2	4.20637	3.41809	3.69616	7.08014	6.50365	6.23062	4290	Zfpm2
Cgnl1	5.15594	4.50857	5.50256	8.99386	8.30673	9.1645	6670	Cgnl1
Vegfa	21.4982	19.414	21.0287	24.0019	32.0104	24.8079	3546	Vegfa
Il18r1	1.00727	0.863091	1.10615	1.92789	1.59536	1.68045	3960	Il18r1
Col3a1	1.235	6.55879	4.04907	80.1383	160.99	153.975	4765	Col3a1
Epha4	2.47581	2.16655	2.0732	3.59641	3.91417	4.15504	6338	Epha4
Hopx	7.36996	6.70455	5.34161	10.6932	14.6444	12.0608	1038	Hopx
F5	0.17347	0.226634	0.156288	0.843524	1.21059	1.2991	6034	F5
Rgs4	102.989	81.6633	91.0388	169.106	196.504	188.617	2917	Rgs4
C1qtnf1	57.7012	55.8411	55.68	74.4152	98.2945	102.519	3704	C1qtnf1
Mmp14	105.702	132.421	115.795	189.706	216.712	224.796	2437	Mmp14
Dock9	9.2177	9.15679	9.67342	11.5559	11.3999	13.4365	9703	Dock9
Ryr2	0.745747	0.574516	0.785789	1.17662	1.03035	1.05043	14817	Ryr2
Vim	1.44383	1.80706	2.11999	18.2223	14.5285	15.487	1857	Vim
Wnt5a	10.8923	10.8862	10.6686	16.0343	17.3137	14.6565	4994	Wnt5a
Rbpms	12.6795	14.7737	12.1543	16.5259	21.0283	25.2	1186	Rbpms
Angpt2	1.98064	1.2973	2.31497	8.00063	9.31974	8.10209	2443	Angpt2
Ets2	22.0525	29.381	23.7779	28.6588	35.2681	37.8847	3614	Ets2
Fstl1	74.4865	72.93	75.934	101.035	95.9911	105.574	3130	Fstl1
Lox	0.163346	0.284483	0.0923814	8.48116	21.6832	34.078	4807	Lox
Chsy3	1.20415	1.33112	1.62529	2.38071	2.4978	2.54316	2661	Chsy3
Myo5b	8.43929e-05	8.02004e-05	7.15637e-05	0.0559793	0.0510481	0.15293	7747	Myo5b
Tspan15	5.95107	7.35184	6.6232	10.41	10.556	11.933	879	Tspan15
Asphd2	0.180769	0.128895	0.153289	1.40184	1.72648	1.4406	2897	Asphd2
