# Supplementary material for: Treatment of Pheochromocytoma Cells with Recurrent Cycles of Hypoxia: A New Pseudohypoxic In Vitro Model
Source: Cells. 2022 Feb 5;11(3):560. doi: 10.3390/cells11030560 (PMC8834104; doi:10.3390/cells11030560)
Supplement: Supplementary file 1 [file cells-11-00560-s001.zip › Supporting information_3.xlsx]

## Sheet: Sheet1
gene_name	gene_id	gene_biotype	baseMean	log2FoldChange	lfcSE	stat	pvalue	padj	PC12 Z20 control 1	PC12 Z20 control 2	PC12 Z20 control 3	PC12 Z20 1	PC12 Z20 2	PC12 Z20 3
Dcdc2	ENSRNOG00000017511	protein_coding	782.361	-2.81968	0.130578	-21.5939	2.04853e-103	3.0476e-99	1154	1327	1581	190	187	220
Etl4	ENSRNOG00000008666	protein_coding	502.508	-3.23376	0.16677	-19.3905	9.2831e-84	3.45262e-80	771	855	1070	135	77	88
Ltbp1	ENSRNOG00000033090	protein_coding	586.036	-2.40359	0.179217	-13.4116	5.16887e-41	8.54415e-38	779	947	1204	151	206	211
Atp8a1	ENSRNOG00000034200	protein_coding	1694.62	-1.11236	0.112448	-9.89222	4.49945e-23	2.4792e-20	2212	2074	2561	1359	880	1090
Slc16a2	ENSRNOG00000002832	protein_coding	634.73	-1.03391	0.114801	-9.00613	2.13451e-19	8.14233e-17	819	786	911	442	379	463
Igf2	ENSRNOG00000020369	protein_coding	828.948	-1.06005	0.117817	-8.99743	2.31065e-19	8.59388e-17	985	1201	1115	564	506	584
Dhrs9	ENSRNOG00000058568	protein_coding	782.565	-1.20662	0.137814	-8.75546	2.0327e-18	7.03268e-16	1075	892	1264	586	384	499
Cplane1	ENSRNOG00000042118	protein_coding	8422.44	-0.708309	0.0832188	-8.51141	1.71835e-17	5.3258e-15	9641	9552	11708	7403	5475	6920
Ica1	ENSRNOG00000008628	protein_coding	2511.22	-0.674492	0.0839948	-8.03017	9.73399e-16	2.63295e-13	2827	2854	3450	2242	1758	1975
Rassf9	ENSRNOG00000038574	protein_coding	111.697	-2.84213	0.362575	-7.83873	4.55121e-15	1.09207e-12	163	172	248	10	30	43
Wdr59	ENSRNOG00000018967	protein_coding	1980.31	-0.639762	0.0845925	-7.56287	3.94282e-14	8.75482e-12	2239	2260	2625	1697	1484	1585
Calhm5	ENSRNOG00000000825	protein_coding	300.859	-1.21689	0.168511	-7.22145	5.14356e-13	9.3318e-11	318	436	496	204	155	201
Glcci1	ENSRNOG00000008524	protein_coding	1526.31	-0.836706	0.115891	-7.21977	5.20771e-13	9.33434e-11	1948	1756	2064	1397	933	1069
Ptger3	ENSRNOG00000010325	protein_coding	3430.13	-0.628795	0.0918855	-6.84324	7.742e-12	1.23847e-09	3596	4372	4329	3125	2358	2850
Unc5c	ENSRNOG00000029071	protein_coding	9095.39	-0.689185	0.101244	-6.80716	9.95412e-12	1.55881e-09	11120	9615	12413	8525	6143	6890
Npnt	ENSRNOG00000052873	protein_coding	38.5468	-3.52389	0.522055	-6.75005	1.47798e-11	2.22101e-09	35	89	88	6	6	7
Krt23	ENSRNOG00000011907	protein_coding	54.1695	-2.44016	0.362615	-6.72935	1.70418e-11	2.51021e-09	93	94	81	15	13	24
Sh2d4a	ENSRNOG00000013541	protein_coding	29.3066	-4.4454	0.674587	-6.5898	4.40408e-11	6.06662e-09	64	41	60	6	2	0
Tex13b	ENSRNOG00000058904	protein_coding	40.2888	-3.24416	0.497878	-6.51596	7.22254e-11	9.85778e-09	68	64	84	6	2	16
Fxyd6	ENSRNOG00000016412	protein_coding	5295.43	-0.570559	0.0910572	-6.26594	3.70573e-10	4.50528e-08	5406	6526	6772	5103	3826	4249
Mospd2	ENSRNOG00000003350	protein_coding	1989.87	-0.8807	0.141291	-6.23324	4.56887e-10	5.31024e-08	2801	1894	2914	1561	1281	1479
Dse	ENSRNOG00000000824	protein_coding	7388.22	-0.573922	0.0922706	-6.21999	4.97194e-10	5.73392e-08	8516	7919	9661	7235	5084	6083
Mark1	ENSRNOG00000002339	protein_coding	2195.81	-0.675376	0.108867	-6.20371	5.51479e-10	6.31104e-08	2622	2533	2803	2158	1473	1611
Bcl6	ENSRNOG00000001843	protein_coding	138.186	-1.45851	0.238189	-6.12332	9.16425e-10	1.00247e-07	152	242	205	95	59	75
Sorbs2	ENSRNOG00000013391	protein_coding	1065.77	-0.658899	0.108938	-6.04836	1.46325e-09	1.54389e-07	1214	1195	1449	933	683	944
Tle1	ENSRNOG00000005882	protein_coding	610.502	-0.687603	0.114026	-6.03025	1.63707e-09	1.70313e-07	660	768	796	521	443	477
Asxl3	ENSRNOG00000015383	protein_coding	26.3152	-3.95295	0.657205	-6.01478	1.8013e-09	1.84814e-07	39	50	58	8	2	0
Grid2	ENSRNOG00000006174	protein_coding	94.2071	-1.53107	0.258227	-5.92918	3.04442e-09	2.90332e-07	141	121	151	65	43	42
Nfat5	ENSRNOG00000011879	protein_coding	5133.73	-0.583607	0.0988706	-5.90274	3.57524e-09	3.38782e-07	6092	5469	6599	4299	3617	4764
Nkd2	ENSRNOG00000016103	protein_coding	3707.15	-0.637253	0.108327	-5.88265	4.03738e-09	3.7831e-07	3648	4873	4825	3509	2575	2894
Manba	ENSRNOG00000052247	protein_coding	857.586	-0.8593	0.14655	-5.86354	4.53107e-09	4.17407e-07	1099	985	1175	549	556	768
Tnfrsf12a	ENSRNOG00000003546	protein_coding	2048.2	-0.693547	0.120006	-5.77929	7.50174e-09	6.68284e-07	2345	2619	2485	1972	1469	1395
Mmd	ENSRNOG00000002436	protein_coding	7265.24	-0.58235	0.101381	-5.7442	9.23572e-09	8.03507e-07	7945	8560	9205	6185	4814	7004
Mboat1	ENSRNOG00000027125	protein_coding	906.417	-0.609931	0.106953	-5.70279	1.17863e-08	1.00197e-06	952	1043	1248	757	656	799
Pcdhb14	ENSRNOG00000020059	protein_coding	260.184	-0.883062	0.155074	-5.69445	1.23767e-08	1.04618e-06	288	331	380	214	168	183
Ypel2	ENSRNOG00000005447	protein_coding	1000.17	-0.640651	0.113875	-5.62589	1.84551e-08	1.52532e-06	1063	1262	1273	970	675	777
Cdc42se1	ENSRNOG00000060538	protein_coding	3285.65	-0.489015	0.0885755	-5.52088	3.37302e-08	2.65505e-06	3566	3846	3893	3265	2460	2727
Mllt11	ENSRNOG00000021110	protein_coding	1058.21	-0.777604	0.141902	-5.47986	4.25653e-08	3.28105e-06	1299	1205	1441	1076	631	721
Fam102b	ENSRNOG00000027540	protein_coding	880.14	-0.720266	0.131501	-5.47727	4.31929e-08	3.31228e-06	882	1153	1207	642	669	727
Cenpp	ENSRNOG00000062220	protein_coding	1388.99	-0.65143	0.120704	-5.39691	6.78001e-08	5.09426e-06	1657	1421	1942	1313	883	1158
Btg2	ENSRNOG00000003300	protein_coding	706.501	-0.698223	0.13009	-5.36724	7.99485e-08	5.94697e-06	711	953	919	616	525	518
Stxbp3	ENSRNOG00000020392	protein_coding	1554.24	-0.63349	0.118205	-5.35925	8.35688e-08	6.18534e-06	1872	1526	2193	1364	1071	1330
AABR07060833.1	ENSRNOG00000006857	protein_coding	343.489	-0.922936	0.172555	-5.34865	8.86145e-08	6.49418e-06	493	355	476	294	202	239
Cnksr3	ENSRNOG00000018052	protein_coding	815.648	-0.632738	0.122886	-5.14899	2.61897e-07	1.75506e-05	794	1030	1115	755	545	681
Tmem159	ENSRNOG00000048250	protein_coding	1824.44	-0.504817	0.0984127	-5.12959	2.90376e-07	1.93719e-05	2122	2020	2157	1789	1304	1576
Ppp2r1b	ENSRNOG00000010922	protein_coding	3576.07	-0.47312	0.0930096	-5.08679	3.64178e-07	2.37626e-05	3730	3948	4617	3697	2609	2972
Kcnf1	ENSRNOG00000024310	protein_coding	555.837	-0.859543	0.169189	-5.08037	3.76701e-07	2.4366e-05	669	756	683	553	288	393
Pax2	ENSRNOG00000014253	protein_coding	18.4073	-5.77945	1.15513	-5.0033	5.63571e-07	3.56776e-05	20	50	37	0	2	0
Adamts8	ENSRNOG00000005574	protein_coding	2147.92	-0.529485	0.105913	-4.99926	5.7552e-07	3.62797e-05	2154	2545	2812	2131	1430	1897
Atf3	ENSRNOG00000003745	protein_coding	171.234	-0.924649	0.189918	-4.86866	1.12356e-06	6.63299e-05	211	221	229	148	110	107
Xylt1	ENSRNOG00000056658	protein_coding	7621.53	-0.605998	0.125506	-4.82844	1.37609e-06	8.0283e-05	6901	9934	10458	7008	5992	5597
Mrps6	ENSRNOG00000059381	protein_coding	1132.1	-0.463448	0.0961122	-4.82195	1.42162e-06	8.19744e-05	1171	1293	1412	1004	904	1021
Fgfr2	ENSRNOG00000016374	protein_coding	777.692	-0.550311	0.115647	-4.75855	1.94988e-06	0.000110719	803	929	1000	771	576	604
Gcnt2	ENSRNOG00000023778	protein_coding	1518.44	-0.630186	0.132521	-4.75536	1.98091e-06	0.000112053	1770	1684	1992	1623	950	1140
Abcc5	ENSRNOG00000029178	protein_coding	2427.8	-0.586445	0.123681	-4.74159	2.12048e-06	0.000119494	3081	2476	3018	2407	1795	1797
Igfbp2	ENSRNOG00000016957	protein_coding	8261.18	-0.561184	0.118597	-4.73185	2.22486e-06	0.000124903	8084	11131	9829	7381	6760	6354
Klhl29	ENSRNOG00000005371	protein_coding	1485.85	-0.530847	0.113405	-4.68098	2.8551e-06	0.000157316	1452	1921	1812	1407	1148	1193
Krt76	ENSRNOG00000031785	protein_coding	881.716	-0.523682	0.11229	-4.66367	3.10622e-06	0.000169894	882	1048	1147	860	677	696
Elmod1	ENSRNOG00000009054	protein_coding	1813.18	-0.675479	0.146057	-4.62477	3.75016e-06	0.000202877	2354	1928	2277	1919	1096	1338
Rfk	ENSRNOG00000022273	protein_coding	1141.27	-0.52967	0.114764	-4.61531	3.92514e-06	0.00021081	1154	1349	1487	1049	758	1088
AABR07014974.1	ENSRNOG00000052298	protein_coding	117.368	-1.06734	0.231557	-4.60941	4.03814e-06	0.000214555	162	147	158	90	79	64
Scin	ENSRNOG00000004498	protein_coding	226.096	-0.844147	0.18394	-4.58926	4.44827e-06	0.000233841	305	242	309	192	127	183
Id4	ENSRNOG00000016099	protein_coding	320.871	-0.646293	0.1425	-4.53538	5.75005e-06	0.000298061	378	381	394	295	223	255
B4galt5	ENSRNOG00000008283	protein_coding	11531.1	-0.37478	0.0829726	-4.51691	6.27494e-06	0.000320798	10957	13277	14287	10973	9435	10523
Dab2	ENSRNOG00000028930	protein_coding	4322	-0.523326	0.116174	-4.50468	6.64718e-06	0.000336611	4807	4533	5730	3394	3198	4323
Glb1l	ENSRNOG00000019243	protein_coding	3886.02	-0.369988	0.0825525	-4.48185	7.39995e-06	0.000371922	3976	4005	4987	3867	3021	3588
Sting1	ENSRNOG00000042137	protein_coding	136.681	-1.11873	0.250252	-4.47041	7.80682e-06	0.000389739	133	222	199	105	91	69
Gng12	ENSRNOG00000050231	protein_coding	1459.76	-0.556386	0.124683	-4.46242	8.10404e-06	0.000400544	1582	1548	2016	1109	1118	1402
Cd9	ENSRNOG00000019556	protein_coding	2546.84	-0.363343	0.0814195	-4.46261	8.09683e-06	0.000400544	2624	2696	3149	2420	2018	2434
Etv4	ENSRNOG00000020792	protein_coding	717.612	-0.520619	0.117094	-4.44615	8.74239e-06	0.000427831	704	880	917	678	555	585
Mxra7	ENSRNOG00000042915	protein_coding	618.829	-0.562591	0.126752	-4.43852	9.05781e-06	0.000438935	708	644	830	615	423	511
Sik2	ENSRNOG00000043498	protein_coding	5715.16	-0.524778	0.118324	-4.43508	9.20389e-06	0.000444566	6128	6384	7420	6276	4038	4242
Cpeb2	ENSRNOG00000005043	protein_coding	1012.46	-0.419755	0.0948274	-4.42652	9.57674e-06	0.000456645	1062	1088	1274	970	805	896
Filip1l	ENSRNOG00000001645	protein_coding	1636.5	-0.69327	0.156886	-4.41893	9.91903e-06	0.000468461	1934	1719	2331	1739	1140	1000
Dock5	ENSRNOG00000024703	protein_coding	2390.14	-0.445668	0.100959	-4.41434	1.01319e-05	0.000477002	2556	2386	3222	2395	1837	2022
Epha2	ENSRNOG00000009222	protein_coding	820.305	-0.466401	0.106087	-4.39641	1.10055e-05	0.000516494	851	976	980	791	639	695
Armc9	ENSRNOG00000025418	protein_coding	1075.59	-0.412679	0.0940248	-4.38905	1.13848e-05	0.000532614	1099	1203	1327	1056	847	945
Runx2	ENSRNOG00000020193	protein_coding	97.0611	-1.19011	0.273536	-4.35083	1.35621e-05	0.000625522	137	123	137	78	63	41
Oas1f	ENSRNOG00000033220	protein_coding	285.747	-0.676546	0.155712	-4.34486	1.39365e-05	0.000639916	305	381	350	251	207	220
Kcnj2	ENSRNOG00000004720	protein_coding	15.015	-3.03841	0.700915	-4.33493	1.45809e-05	0.00066134	29	19	31	4	4	2
Lipg	ENSRNOG00000018694	protein_coding	335.068	-0.863758	0.199225	-4.3356	1.45364e-05	0.00066134	365	445	468	181	246	298
Adamtsl4	ENSRNOG00000049385	protein_coding	2029.21	-0.471127	0.109614	-4.29804	1.72311e-05	0.000769812	2054	2534	2360	1921	1689	1620
G2e3	ENSRNOG00000004232	protein_coding	1732.8	-0.462962	0.107876	-4.2916	1.77392e-05	0.000790136	2024	1674	2231	1610	1350	1532
Fat1	ENSRNOG00000030954	protein_coding	15226.7	-0.3341	0.07787	-4.29049	1.78279e-05	0.00079172	14778	17135	18269	15689	12000	13955
Prnp	ENSRNOG00000021259	protein_coding	14427.8	-0.360271	0.0842753	-4.27493	1.91201e-05	0.000844063	15521	14790	17565	15190	10985	12951
Tmeff1	ENSRNOG00000008034	protein_coding	677.582	-0.59395	0.139081	-4.27053	1.95013e-05	0.000855812	815	688	904	692	478	503
Stard13	ENSRNOG00000001090	protein_coding	269.892	-0.77901	0.182737	-4.26302	2.01682e-05	0.000872214	309	353	343	192	161	261
Myadm	ENSRNOG00000053450	protein_coding	5504.61	-0.49662	0.116669	-4.25664	2.07523e-05	0.000889718	6051	6336	6597	6074	3917	4190
Csgalnact1	ENSRNOG00000013024	protein_coding	2324.08	-0.536089	0.126607	-4.23427	2.29295e-05	0.000977428	2739	2419	2955	2498	1690	1693
Etv5	ENSRNOG00000001785	protein_coding	1168.91	-0.433947	0.102564	-4.23101	2.32648e-05	0.000988886	1171	1384	1412	1163	854	1061
LOC103691744	ENSRNOG00000010658	protein_coding	127.917	-0.869647	0.208171	-4.17757	2.94643e-05	0.00121761	149	174	164	98	82	99
LOC103691744	ENSRNOG00000057089	protein_coding	127.917	-0.869647	0.208171	-4.17757	2.94643e-05	0.00121761	149	174	164	98	82	99
Zfand2a	ENSRNOG00000032917	protein_coding	1505.34	-0.357229	0.0877471	-4.07112	4.67883e-05	0.00187115	1577	1584	1831	1423	1232	1411
Chn1	ENSRNOG00000017939	protein_coding	1449.91	-0.648138	0.15933	-4.0679	4.74388e-05	0.00189208	1890	1442	1881	1583	933	1001
Pnpla7	ENSRNOG00000008190	protein_coding	1208.64	-0.393013	0.0966919	-4.06459	4.81171e-05	0.00191363	1214	1374	1464	1147	1017	1051
Prpf38b	ENSRNOG00000020438	protein_coding	2258.78	-0.405339	0.0997882	-4.062	4.86547e-05	0.0019251	2455	2217	2942	2167	1697	2143
Tgfb2	ENSRNOG00000002418	protein_coding	4312.88	-0.464371	0.115126	-4.03358	5.49334e-05	0.00215632	4920	4528	5296	4717	2901	3661
Nefm	ENSRNOG00000013916	protein_coding	5885.2	-0.514913	0.128463	-4.00827	6.11644e-05	0.00237583	6256	6872	7309	6602	4277	4163
Tlr2	ENSRNOG00000009822	protein_coding	49.6281	-1.35755	0.339752	-3.99572	6.44982e-05	0.0024988	67	61	83	26	33	26
Spcs3	ENSRNOG00000038933	protein_coding	5926.47	-0.473864	0.118717	-3.99156	6.56402e-05	0.00253644	7149	5504	7684	5921	4173	5287
Pak1ip1	ENSRNOG00000023799	protein_coding	2289.87	-0.404803	0.101889	-3.97299	7.09764e-05	0.00273553	2460	2334	2919	2443	1713	1950
Slc38a2	ENSRNOG00000006305	protein_coding	16074	-0.296315	0.0747042	-3.96651	7.29323e-05	0.00280365	15746	17411	19202	16447	12577	15598
Lsm1	ENSRNOG00000015375	protein_coding	481.8	-0.493676	0.12547	-3.9346	8.33368e-05	0.0031467	542	540	578	429	352	454
Fam131b	ENSRNOG00000017149	protein_coding	2178.46	-0.457227	0.117116	-3.90405	9.45981e-05	0.00350084	2512	2156	2773	2335	1591	1767
Ccn2	ENSRNOG00000015036	protein_coding	349.835	-0.834522	0.214493	-3.89067	9.9968e-05	0.00363625	552	325	436	300	186	296
Resf1	ENSRNOG00000036913	protein_coding	1895.82	-0.461114	0.119079	-3.87232	0.000107803	0.00389268	2201	1770	2522	1854	1358	1728
Tcf4	ENSRNOG00000012405	protein_coding	2116.79	-0.412218	0.10654	-3.86913	0.000109226	0.00393453	2024	2530	2592	2228	1628	1764
Fancb	ENSRNOG00000003346	protein_coding	237.729	-0.830842	0.21481	-3.86779	0.000109825	0.00393465	351	229	314	161	149	217
Pbx1	ENSRNOG00000004693	protein_coding	1916.94	-0.394519	0.102023	-3.86696	0.000110201	0.00393465	2058	2027	2342	2047	1511	1564
Rcan1	ENSRNOG00000001979	protein_coding	1168.92	-0.353584	0.0924367	-3.82515	0.000130691	0.00455339	1183	1251	1442	1149	969	1045
Cacna1c	ENSRNOG00000007090	protein_coding	802.531	-0.407921	0.107255	-3.80328	0.00014279	0.00495173	806	948	946	773	648	705
Tmem14c	ENSRNOG00000015437	protein_coding	2424.36	-0.336539	0.0887243	-3.79309	0.000148786	0.00514764	2335	2666	3005	2491	1990	2132
Slfn13	ENSRNOG00000021412	protein_coding	1499.28	-0.377442	0.0996379	-3.78813	0.000151784	0.00522706	1675	1481	1843	1411	1216	1391
Gabarapl2	ENSRNOG00000019425	protein_coding	2328.44	-0.32762	0.0873235	-3.75179	0.000175574	0.00596349	2520	2502	2606	2354	1875	2146
Bmp2	ENSRNOG00000021276	protein_coding	1209.67	-0.625997	0.167403	-3.73947	0.000184409	0.00622097	1476	1404	1435	1402	768	798
Bag4	ENSRNOG00000042560	protein_coding	460.674	-0.496349	0.133064	-3.73014	0.00019137	0.00644121	450	582	560	430	352	397
Esrrg	ENSRNOG00000002593	protein_coding	5.07779	-5.81651	1.56568	-3.715	0.000203201	0.00677807	15	10	4	0	0	0
Ston1	ENSRNOG00000016688	protein_coding	2676.45	-0.450881	0.121354	-3.71542	0.000202869	0.00677807	2499	3109	3559	2169	2098	2686
RT1-Ba	ENSRNOG00000000451	protein_coding	53.9835	-1.27284	0.343623	-3.70419	0.000212071	0.00700365	90	69	64	36	23	39
Lrch1	ENSRNOG00000009412	protein_coding	866.35	-0.391625	0.105915	-3.69754	0.000217698	0.00716524	940	907	1055	881	642	797
Mdm1	ENSRNOG00000007286	protein_coding	853.759	-0.44923	0.121798	-3.68832	0.000225741	0.00739723	978	817	1118	850	642	740
Pawr	ENSRNOG00000005917	protein_coding	1614.7	-0.44187	0.119869	-3.68628	0.000227554	0.00740771	1918	1586	1977	1681	1126	1443
Serinc3	ENSRNOG00000009552	protein_coding	9908.87	-0.296042	0.0802859	-3.68735	0.000226605	0.00740771	10202	10133	11925	9996	7649	9871
Sesn3	ENSRNOG00000008173	protein_coding	1472.31	-0.34597	0.094095	-3.67682	0.000236164	0.00763794	1489	1572	1810	1533	1202	1268
Abhd17c	ENSRNOG00000012683	protein_coding	2371.76	-0.362221	0.09857	-3.67476	0.000238075	0.00768297	2429	2686	2753	2563	1759	2114
Ccnd2	ENSRNOG00000057710	protein_coding	1328.64	-0.463837	0.126426	-3.66886	0.000243638	0.00784547	1287	1620	1646	1091	991	1359
Rtkn2	ENSRNOG00000000636	protein_coding	377.324	-0.505771	0.137973	-3.66573	0.000246636	0.00792485	392	429	489	381	260	326
Irs2	ENSRNOG00000023509	protein_coding	3299.75	-0.512231	0.139862	-3.6624	0.000249862	0.00799398	3582	4073	3757	3741	2376	2331
Scp2	ENSRNOG00000011413	protein_coding	1940.77	-0.319683	0.0875069	-3.65324	0.000258957	0.00823183	2038	1979	2345	1877	1661	1775
Pgghg	ENSRNOG00000014783	protein_coding	811.218	-0.393436	0.107846	-3.64813	0.000264155	0.00836135	867	867	984	813	673	675
Kdsr	ENSRNOG00000002781	protein_coding	1185.04	-0.349068	0.0961725	-3.6296	0.000283861	0.00889054	1186	1231	1513	1135	959	1120
Cdc42ep3	ENSRNOG00000032136	protein_coding	1944.49	-0.376263	0.103807	-3.62466	0.000289346	0.00904327	1989	2196	2297	2106	1394	1754
Iqgap2	ENSRNOG00000025406	protein_coding	1536.16	-0.445712	0.123994	-3.59462	0.000324865	0.0100478	1812	1452	1965	1475	1072	1483
Thy1	ENSRNOG00000006604	protein_coding	19707	-0.271287	0.0756836	-3.58449	0.000337742	0.0103814	18860	21825	22982	20528	16394	18203
Ptpn21	ENSRNOG00000060568	protein_coding	2234.37	-0.33437	0.0933256	-3.58284	0.000339884	0.0104099	2202	2466	2697	2405	1744	1969
Rdh10	ENSRNOG00000006681	protein_coding	114.122	-0.785158	0.220836	-3.55539	0.000377414	0.0113465	149	130	146	95	72	92
Rrm2	ENSRNOG00000054286	protein_coding	4140.63	-0.273474	0.0769199	-3.55531	0.000377529	0.0113465	4186	4332	4861	4358	3443	3774
Dcun1d3	ENSRNOG00000014037	protein_coding	275.584	-0.530353	0.150331	-3.52791	0.000418852	0.0123882	276	314	375	252	206	238
Pdp1	ENSRNOG00000016180	protein_coding	1453.25	-0.420263	0.119566	-3.51491	0.000439908	0.0129594	1636	1332	1955	1364	1173	1292
Myl12a	ENSRNOG00000015278	protein_coding	8477.62	-0.308053	0.0877608	-3.51015	0.000447862	0.0131158	8588	9096	10004	9310	6437	7744
Znrf1	ENSRNOG00000019028	protein_coding	1084.41	-0.402819	0.11489	-3.50614	0.00045466	0.0132887	1040	1356	1246	1053	876	950
Sybu	ENSRNOG00000004200	protein_coding	752.186	-0.430651	0.12362	-3.48367	0.000494582	0.014399	889	725	932	736	591	650
Vdr	ENSRNOG00000054420	protein_coding	251.347	-0.635221	0.182401	-3.48254	0.000496676	0.0144317	272	278	355	197	224	180
Ppm1b	ENSRNOG00000030667	protein_coding	2076.73	-0.335516	0.0964125	-3.48	0.000501406	0.0144843	2249	2011	2586	2092	1625	1958
RGD1562987	ENSRNOG00000018676	protein_coding	1970.83	-0.288468	0.0832225	-3.46623	0.000527814	0.0151588	2006	2020	2377	1958	1609	1908
Fxr2	ENSRNOG00000011876	protein_coding	2919.5	-0.264499	0.0764412	-3.46016	0.000539847	0.0154448	2883	3106	3421	3000	2402	2787
Sptssa	ENSRNOG00000004292	protein_coding	918.356	-0.404313	0.117122	-3.45208	0.000556291	0.0158543	1063	901	1120	847	704	888
Siglec10	ENSRNOG00000037339	protein_coding	233.693	-0.794776	0.231069	-3.43956	0.000582654	0.0164481	315	230	330	255	146	131
Edn1	ENSRNOG00000014361	protein_coding	192.599	-0.942105	0.274169	-3.43622	0.000589888	0.016558	309	173	262	206	96	111
Crem	ENSRNOG00000014900	protein_coding	250.493	-0.589182	0.171561	-3.43425	0.000594194	0.016585	299	242	349	233	189	195
Nedd1	ENSRNOG00000004011	protein_coding	926.734	-0.354876	0.103537	-3.42754	0.000609084	0.0169371	915	1046	1112	929	700	887
Lhfpl6	ENSRNOG00000014153	protein_coding	1465.84	-0.404615	0.11809	-3.42633	0.000611787	0.0169564	1496	1766	1657	1295	1090	1509
Nnt	ENSRNOG00000026842	protein_coding	8257.45	-0.24884	0.0726403	-3.42564	0.000613357	0.0169608	8226	8717	9525	8545	6644	8137
Dusp1	ENSRNOG00000003977	protein_coding	516.199	-0.526703	0.153909	-3.42218	0.000621223	0.0171464	512	699	584	533	357	422
Trio	ENSRNOG00000012148	protein_coding	2239.91	-0.399822	0.116909	-3.41993	0.000626363	0.0172391	2422	2443	2647	2542	1656	1798
Pxdn	ENSRNOG00000060614	protein_coding	3868.06	-0.315139	0.0921676	-3.4192	0.000628056	0.0172391	3755	4360	4552	4200	3004	3472
Mrs2	ENSRNOG00000017545	protein_coding	427.315	-0.451725	0.132138	-3.4186	0.000629449	0.0172455	501	446	506	394	336	382
Stradb	ENSRNOG00000010728	protein_coding	492.075	-0.533278	0.156151	-3.41514	0.000637481	0.0173696	613	471	632	516	346	385
Hsd17b11	ENSRNOG00000002210	protein_coding	670.699	-0.388746	0.113821	-3.41541	0.000636857	0.0173696	677	707	868	681	501	616
Gk	ENSRNOG00000034116	protein_coding	497.227	-0.641946	0.18854	-3.40483	0.000662056	0.01795	699	456	626	523	302	385
Slc4a7	ENSRNOG00000005957	protein_coding	539.335	-0.465512	0.137206	-3.39278	0.000691867	0.0186581	591	561	697	461	386	552
Cited2	ENSRNOG00000056940	protein_coding	1062.81	-0.461069	0.135904	-3.39261	0.000692297	0.0186581	1180	1333	1098	1118	754	902
Itga6	ENSRNOG00000001518	protein_coding	9802.06	-0.389392	0.114856	-3.39025	0.000698293	0.0187518	9800	10639	12456	8064	7576	10487
Glp2r	ENSRNOG00000003683	protein_coding	13.3286	-2.27678	0.67257	-3.3852	0.000711269	0.0189974	21	22	22	3	4	7
Gcnt4	ENSRNOG00000055451	protein_coding	3.95956	-5.46019	1.62767	-3.35462	0.000794749	0.0207429	12	4	7	0	0	0
Plcb1	ENSRNOG00000004810	protein_coding	665.792	-0.440681	0.131512	-3.35088	0.000805554	0.0209881	719	698	848	669	570	499
Pclaf	ENSRNOG00000016561	protein_coding	831.292	-0.384315	0.115165	-3.33709	0.0008466	0.0218661	921	835	1021	779	725	711
Ldah	ENSRNOG00000021475	protein_coding	2864.11	-0.263324	0.0793382	-3.31901	0.000903374	0.0232116	2841	3003	3387	2932	2295	2818
Kalrn	ENSRNOG00000001706	protein_coding	1510.68	-0.308501	0.09314	-3.31223	0.000925557	0.0236589	1547	1606	1781	1617	1213	1343
Osbpl6	ENSRNOG00000010812	protein_coding	2828.82	-0.322135	0.0973874	-3.30777	0.000940408	0.0239153	3002	2899	3375	3110	2242	2430
Pdgfc	ENSRNOG00000010695	protein_coding	962.971	-0.378267	0.114596	-3.30087	0.000963872	0.0244081	1007	981	1232	884	720	983
Kirrel1	ENSRNOG00000016408	protein_coding	9290.87	-0.243333	0.0737701	-3.29853	0.000971908	0.0245069	9184	9885	10658	9898	7507	8908
Clec2g	ENSRNOG00000059538	protein_coding	169.232	-0.802727	0.243588	-3.29543	0.000982721	0.0246542	208	176	252	92	146	136
Ankzf1	ENSRNOG00000019052	protein_coding	2637.49	-0.268084	0.0813808	-3.29419	0.000987047	0.024721	2679	2757	3069	2798	2174	2420
Mcc	ENSRNOG00000062232	protein_coding	2093.73	-0.338945	0.103057	-3.28891	0.00100575	0.0249793	2008	2257	2662	2287	1642	1795
Mcc	ENSRNOG00000011271	protein_coding	2093.73	-0.338945	0.103057	-3.28891	0.00100575	0.0249793	2008	2257	2662	2287	1642	1795
Syt11	ENSRNOG00000020279	protein_coding	1096.84	-0.44436	0.135159	-3.28769	0.00101013	0.0250161	1127	1225	1386	1220	867	788
Sema5a	ENSRNOG00000011977	protein_coding	11361.3	-0.278915	0.0848394	-3.28756	0.0010106	0.0250161	12025	10998	13766	11877	9515	10288
Cys1	ENSRNOG00000058891	protein_coding	728.772	-0.398785	0.121343	-3.28642	0.00101469	0.025066	779	793	873	782	581	580
Arhgef3	ENSRNOG00000014363	protein_coding	1479.63	-0.289173	0.0879998	-3.28606	0.00101598	0.025066	1516	1573	1712	1540	1191	1384
Sult1a1	ENSRNOG00000019342	protein_coding	204.703	-0.749825	0.228852	-3.27647	0.00105114	0.0257626	261	177	324	166	115	193
Mapk6	ENSRNOG00000009381	protein_coding	5285.91	-0.296516	0.0906744	-3.27011	0.00107504	0.026305	5662	5130	6415	5370	4092	5214
B2m	ENSRNOG00000017123	protein_coding	28490.2	-0.250028	0.0767317	-3.25847	0.00112014	0.0272294	29854	28031	33457	28102	24052	28052
Hivep1	ENSRNOG00000014460	protein_coding	732.538	-0.397049	0.122217	-3.24873	0.00115921	0.0279961	776	786	897	804	557	598
Msn	ENSRNOG00000030118	protein_coding	22531.1	-0.248454	0.0765703	-3.24478	0.00117542	0.0282956	22554	22339	27463	23747	18174	21757
Arsb	ENSRNOG00000011150	protein_coding	3924.44	-0.282558	0.0871103	-3.24368	0.00117996	0.0283133	3853	4172	4707	4299	3112	3552
Synm	ENSRNOG00000014030	protein_coding	3683.18	-0.259313	0.0803507	-3.22727	0.00124979	0.029749	3572	3907	4384	3891	2929	3552
Tnip3	ENSRNOG00000054524	protein_coding	24.4766	-1.62427	0.503965	-3.22299	0.00126861	0.0301323	30	24	57	14	12	11
Sh3bp4	ENSRNOG00000019316	protein_coding	2221.28	-0.380347	0.118065	-3.22152	0.00127514	0.0301323	2107	2684	2630	2458	1709	1813
Dusp16	ENSRNOG00000006628	protein_coding	356.953	-0.503045	0.156188	-3.22077	0.00127847	0.0301423	396	382	459	392	242	284
Rrm1	ENSRNOG00000045752	protein_coding	12678.6	-0.303543	0.0946111	-3.20832	0.00133513	0.0311711	13710	11914	15768	13308	9992	11807
Rgs7	ENSRNOG00000021984	protein_coding	358.066	-0.562436	0.176132	-3.19326	0.00140678	0.0326499	428	335	501	382	228	290
Ctsd	ENSRNOG00000020206	protein_coding	28828	-0.246557	0.0774717	-3.18255	0.00145986	0.0337241	27275	31758	33383	28678	25317	27147
Add2	ENSRNOG00000015903	protein_coding	190.844	-0.695623	0.218791	-3.1794	0.00147582	0.0339348	194	271	230	167	163	116
Trim21	ENSRNOG00000018517	protein_coding	360.731	-0.494317	0.155499	-3.17891	0.00147829	0.0339391	440	337	468	335	266	324
Bpgm	ENSRNOG00000010133	protein_coding	2305.04	-0.317904	0.100058	-3.17722	0.00148696	0.0340332	2381	2309	2874	2484	1908	1946
Ramp1	ENSRNOG00000019926	protein_coding	210.229	-0.626064	0.197516	-3.16968	0.00152605	0.0347673	204	291	258	158	148	203
Nhs	ENSRNOG00000030759	protein_coding	1061.01	-0.311649	0.0983867	-3.16759	0.00153708	0.034965	1127	1062	1280	1028	885	1004
Txndc16	ENSRNOG00000006334	protein_coding	1102.94	-0.305315	0.0964268	-3.16629	0.00154397	0.0350681	1139	1113	1351	1080	894	1070
Shisa4	ENSRNOG00000007369	protein_coding	492.242	-0.577897	0.182866	-3.16022	0.00157648	0.0356529	488	646	607	566	342	320
Azin2	ENSRNOG00000051507	protein_coding	554.145	-0.52432	0.165918	-3.16011	0.00157707	0.0356529	521	770	636	545	456	398
Fam13b	ENSRNOG00000020384	protein_coding	1320.02	-0.354478	0.112564	-3.14912	0.00163761	0.0367462	1478	1246	1651	1346	996	1244
Irf8	ENSRNOG00000017869	protein_coding	477.357	-0.421163	0.134276	-3.13654	0.00170954	0.0381874	522	506	585	513	367	383
Klhl7	ENSRNOG00000010453	protein_coding	2164.73	-0.298267	0.0951482	-3.13476	0.00171992	0.0383617	2120	2150	2808	2232	1731	2038
Ilk	ENSRNOG00000018993	protein_coding	4647.63	-0.263907	0.0842745	-3.13151	0.00173909	0.0386733	4871	4769	5311	5031	3684	4358
Hexb	ENSRNOG00000025274	protein_coding	3197.22	-0.262768	0.084107	-3.12421	0.00178285	0.0393523	3268	3177	3861	3184	2589	3201
Tgfbr3	ENSRNOG00000002093	protein_coding	437.614	-0.495543	0.158683	-3.12286	0.00179105	0.0394746	494	482	533	339	314	466
Npepo	ENSRNOG00000017505	protein_coding	1286.08	-0.357344	0.114804	-3.11264	0.00185424	0.0404512	1330	1416	1516	1440	1008	1044
Susd4	ENSRNOG00000003562	protein_coding	2585.88	-0.303193	0.0975311	-3.10869	0.00187921	0.0408729	2440	2856	3156	2805	2114	2237
Dnah17	ENSRNOG00000003028	protein_coding	35.2912	-1.44399	0.464571	-3.10822	0.0018822	0.0408781	57	34	62	31	8	21
Spag9	ENSRNOG00000002749	protein_coding	5208.57	-0.284776	0.0918421	-3.10072	0.00193052	0.0418054	5495	5011	6401	5483	4037	5018
Lysmd2	ENSRNOG00000010642	protein_coding	573.404	-0.359763	0.116198	-3.09611	0.00196076	0.0423985	623	580	699	544	472	531
Cdh23	ENSRNOG00000033087	protein_coding	31.0126	-1.703	0.551335	-3.08887	0.00200922	0.0432312	38	34	70	17	23	4
Mcm7	ENSRNOG00000001349	protein_coding	4168.88	-0.229097	0.07418	-3.08839	0.00201244	0.0432312	4035	4315	4950	4279	3572	3983
Fads3	ENSRNOG00000020385	protein_coding	2123.45	-0.363995	0.117936	-3.08636	0.00202621	0.0433103	2249	2275	2527	2457	1523	1795
Rnf145	ENSRNOG00000004602	protein_coding	3744.23	-0.283501	0.0919903	-3.08186	0.00205714	0.0439084	3749	3822	4584	3404	3220	3757
Cpm	ENSRNOG00000034134	protein_coding	181.537	-0.538792	0.175221	-3.07493	0.00210551	0.0445235	199	212	223	169	142	145
Atp11a	ENSRNOG00000017154	protein_coding	6124.11	-0.238725	0.0776804	-3.07317	0.00211796	0.0446935	6214	6205	7153	6600	5108	5649
Dusp3	ENSRNOG00000036798	protein_coding	4227.73	-0.284766	0.0928225	-3.06785	0.00215604	0.0454325	4459	4390	4838	4697	3349	3758
Cpq	ENSRNOG00000005931	protein_coding	1885.07	-0.291854	0.0953671	-3.06032	0.00221098	0.0463931	1829	1913	2406	1966	1582	1682
Cnppd1	ENSRNOG00000018325	protein_coding	3312.02	-0.250219	0.0817806	-3.05963	0.00221608	0.0464347	3153	3590	3892	3516	2717	3116
MGC105649	ENSRNOG00000050251	protein_coding	228.783	-0.507508	0.165927	-3.05863	0.00222354	0.0465254	269	252	269	193	179	209
Cep55	ENSRNOG00000016377	protein_coding	2462.02	-0.362824	0.118834	-3.0532	0.00226414	0.0472421	2762	2247	3181	2542	1785	2352
Wls	ENSRNOG00000036816	protein_coding	17064.5	-0.247453	0.0810943	-3.05142	0.00227761	0.0474565	17482	16583	20688	17441	13716	17064
Plpbp	ENSRNOG00000013751	protein_coding	1745.8	-0.280654	0.0920458	-3.04907	0.00229552	0.0477581	1735	1734	2201	1799	1423	1647
Sema6c	ENSRNOG00000021101	protein_coding	477.21	-0.535381	0.175988	-3.04214	0.00234902	0.0486042	485	642	535	517	368	320
Tspan7	ENSRNOG00000003229	protein_coding	5807.54	-0.263568	0.0867169	-3.0394	0.00237047	0.0489118	5902	6124	6666	6420	4504	5436
Fhl1	ENSRNOG00000000875	protein_coding	6608.59	-0.231117	0.0760878	-3.03751	0.00238543	0.0490844	6415	6881	7796	7138	5468	6186
Abhd5	ENSRNOG00000000221	protein_coding	1796.87	-0.37136	0.122497	-3.03157	0.00243282	0.0498528	2124	1706	2139	1956	1341	1561
