# Supplementary material for: Treatment of Pheochromocytoma Cells with Recurrent Cycles of Hypoxia: A New Pseudohypoxic In Vitro Model
Source: Cells. 2022 Feb 5;11(3):560. doi: 10.3390/cells11030560 (PMC8834104; doi:10.3390/cells11030560)
Supplement: Supplementary file 1 [file cells-11-00560-s001.zip › Supporting information_4.xlsx]

## Sheet: Sheet1
gene_name	gene_id	gene_biotype	baseMean	log2FoldChange	lfcSE	stat	pvalue	padj	PC12 Z20 control 1	PC12 Z20 control 2	PC12 Z20 control 3	PC12 Z20 1	PC12 Z20 2	PC12 Z20 3
Vnn1	ENSRNOG00000016219	protein_coding	715.39	4.2963	0.199773	21.5059	1.37112e-102	1.01991e-98	81	50	73	1244	1171	1779
Col5a2	ENSRNOG00000003736	protein_coding	3363.54	2.78256	0.133474	20.8473	1.61324e-96	8.00004e-93	624	922	988	5751	5582	6711
Pdgfrb	ENSRNOG00000018461	protein_coding	2307.13	1.58989	0.0961514	16.5353	2.04396e-61	6.0816e-58	951	1171	1284	3811	3321	3530
Vim	ENSRNOG00000018087	protein_coding	276.531	3.15331	0.197571	15.9604	2.41302e-57	5.98309e-54	41	54	71	625	410	510
AABR07054614.1	ENSRNOG00000008245	protein_coding	201.145	3.50421	0.227766	15.3852	2.05876e-53	4.37544e-50	39	23	34	438	322	384
Igf1	ENSRNOG00000004517	protein_coding	1519.53	1.43233	0.105226	13.612	3.39709e-42	6.31731e-39	760	815	848	2738	1869	2271
Nhsl1	ENSRNOG00000060603	protein_coding	951.321	1.67767	0.127841	13.1231	2.42892e-39	3.6135e-36	386	480	472	1845	1270	1378
St3gal1	ENSRNOG00000008209	protein_coding	609.317	2.00055	0.152681	13.1028	3.17328e-39	4.29172e-36	238	227	253	907	877	1215
Cgn	ENSRNOG00000020952	protein_coding	726.139	2.34471	0.179432	13.0674	5.05454e-39	6.26637e-36	231	214	260	992	1124	1604
Gata4	ENSRNOG00000010708	protein_coding	175.288	5.9964	0.462004	12.9791	1.60726e-38	1.83932e-35	6	2	8	216	365	467
Vcan	ENSRNOG00000029212	protein_coding	219.711	3.0118	0.236199	12.7511	3.07331e-37	3.26583e-34	39	41	64	335	370	494
Ptprz1	ENSRNOG00000006030	protein_coding	266.117	2.68513	0.211961	12.668	8.88979e-37	8.81689e-34	67	46	100	476	461	477
Tgfbr2	ENSRNOG00000013265	protein_coding	125.2	6.1895	0.503304	12.2977	9.31368e-35	8.65998e-32	2	4	4	297	243	221
Drd2	ENSRNOG00000008428	protein_coding	173.095	2.72766	0.225658	12.0876	1.22878e-33	1.07533e-30	43	41	50	333	324	264
Plin2	ENSRNOG00000007060	protein_coding	750.321	1.6846	0.147773	11.3999	4.18496e-30	3.45887e-27	406	292	347	1323	973	1247
Tgfbi	ENSRNOG00000012216	protein_coding	465.679	1.75654	0.156483	11.2251	3.06975e-29	2.40362e-26	207	185	236	670	675	862
Ccn5	ENSRNOG00000010666	protein_coding	231.827	2.4078	0.217556	11.0675	1.8031e-28	1.34124e-25	81	50	86	362	402	429
Serpine2	ENSRNOG00000015461	protein_coding	320.625	2.73387	0.250025	10.9344	7.89579e-28	5.59361e-25	70	94	83	387	537	778
Rapgef5	ENSRNOG00000005271	protein_coding	1288.6	1.65995	0.152896	10.8567	1.85299e-27	1.25304e-24	448	675	716	1805	1969	2219
Col6a1	ENSRNOG00000001249	protein_coding	504.006	2.15603	0.200298	10.7641	5.08542e-27	3.28938e-24	128	240	177	747	837	934
Wfdc1	ENSRNOG00000015904	protein_coding	363.394	2.08701	0.203813	10.2399	1.31433e-24	8.14723e-22	86	179	145	614	587	605
Angpt2	ENSRNOG00000016696	protein_coding	210.525	2.17229	0.214495	10.1275	4.17206e-24	2.48271e-21	74	51	102	361	346	351
Sez6l	ENSRNOG00000025612	protein_coding	553.093	1.39881	0.139705	10.0126	1.34149e-23	7.67589e-21	301	304	289	994	735	750
Pkp1	ENSRNOG00000010076	protein_coding	507.894	1.31593	0.135282	9.72732	2.30597e-22	1.22521e-19	281	272	305	712	684	831
AABR07007068.1	ENSRNOG00000017438	protein_coding	411.286	1.8173	0.187591	9.68755	3.40586e-22	1.74721e-19	222	146	164	806	558	621
Lox	ENSRNOG00000014426	protein_coding	868.266	6.89897	0.722524	9.54843	1.31671e-21	6.52958e-19	12	22	8	753	1584	2905
Rgs4	ENSRNOG00000002773	protein_coding	6732.88	1.0013	0.10511	9.52621	1.63137e-21	7.82901e-19	4595	3834	4790	9111	8711	9757
Slc1a1	ENSRNOG00000014816	protein_coding	112.014	3.03048	0.320661	9.45073	3.36487e-21	1.56435e-18	26	20	26	157	167	290
Smpd3	ENSRNOG00000000257	protein_coding	918.053	1.71665	0.1822	9.42178	4.43511e-21	1.99943e-18	383	429	452	1064	1424	1806
Pdgfra	ENSRNOG00000002244	protein_coding	239.826	1.78762	0.191897	9.31553	1.21342e-20	5.30941e-18	110	78	131	454	325	373
Man1a1	ENSRNOG00000000800	protein_coding	168.197	3.1492	0.340021	9.26179	2.01036e-20	8.54517e-18	49	26	24	197	303	420
Msln	ENSRNOG00000019445	protein_coding	98.4297	3.34237	0.368328	9.07446	1.14246e-19	4.72123e-17	19	15	18	118	163	267
Tifa	ENSRNOG00000010941	protein_coding	91.1437	2.62656	0.290405	9.04447	1.50391e-19	6.04694e-17	29	17	29	195	137	154
Matn3	ENSRNOG00000056141	protein_coding	98.313	3.12807	0.347283	9.00729	2.11215e-19	8.14233e-17	23	21	15	126	174	238
Syt15	ENSRNOG00000051688	protein_coding	100.774	3.146	0.35492	8.86397	7.72156e-19	2.8018e-16	18	26	16	125	172	256
Slc1a3	ENSRNOG00000016163	protein_coding	80.1967	4.75689	0.541221	8.78917	1.50668e-18	5.33687e-16	6	2	9	77	132	264
Sema3d	ENSRNOG00000007202	protein_coding	99.3265	3.22757	0.369679	8.73075	2.52996e-18	8.55415e-16	32	6	18	192	163	198
Enc1	ENSRNOG00000016541	protein_coding	607.769	1.18558	0.136945	8.65735	4.8286e-18	1.59634e-15	295	412	390	877	774	950
Mgll	ENSRNOG00000014508	protein_coding	252.159	1.68186	0.194347	8.65393	4.97567e-18	1.6092e-15	98	139	116	353	385	439
Plpp3	ENSRNOG00000008116	protein_coding	1278.24	1.58244	0.183906	8.60465	7.6549e-18	2.42302e-15	500	752	636	1507	2039	2289
Upk3b	ENSRNOG00000023686	protein_coding	614.328	4.20735	0.49704	8.46481	2.5656e-17	7.78948e-15	67	50	69	607	1134	1804
Creb3l1	ENSRNOG00000005413	protein_coding	101.175	2.14088	0.253252	8.45356	2.82551e-17	8.40702e-15	38	36	36	187	164	156
C1qtnf2	ENSRNOG00000003870	protein_coding	49.6216	3.83819	0.46402	8.27159	1.32188e-16	3.856e-14	6	9	4	82	104	96
Col4a3	ENSRNOG00000015365	protein_coding	69.0544	4.81151	0.585256	8.22121	2.01456e-16	5.76358e-14	2	8	4	54	156	191
Cav1	ENSRNOG00000056836	protein_coding	490.53	3.63034	0.442019	8.21308	2.15588e-16	6.05152e-14	81	83	49	617	856	1300
Htra1	ENSRNOG00000020533	protein_coding	11237.4	0.545699	0.0675794	8.07493	6.75134e-16	1.86e-13	8263	8838	9890	14764	12290	14074
Col4a6	ENSRNOG00000056772	protein_coding	60.6514	5.46303	0.681057	8.02139	1.04554e-15	2.74024e-13	0	4	4	52	118	190
Cobl	ENSRNOG00000004281	protein_coding	178.49	2.61088	0.325511	8.02088	1.0499e-15	2.74024e-13	68	20	60	317	222	414
Ryr1	ENSRNOG00000020557	protein_coding	559.046	1.08094	0.135025	8.00544	1.19043e-15	3.05344e-13	320	308	437	909	647	797
Angpt1	ENSRNOG00000005854	protein_coding	87.6583	2.11899	0.2684	7.89489	2.9057e-15	7.32679e-13	32	28	37	170	118	154
Elmo1	ENSRNOG00000059705	protein_coding	452.253	1.68647	0.214496	7.86249	3.76564e-15	9.33691e-13	218	145	273	576	645	895
Sulf2	ENSRNOG00000006052	protein_coding	6427.34	1.3752	0.175121	7.85286	4.06655e-15	9.91772e-13	3075	3668	3825	6807	9165	12345
Abca4	ENSRNOG00000012892	protein_coding	76.6083	3.20216	0.410662	7.79755	6.31194e-15	1.49052e-12	20	10	14	88	128	206
Thbs1	ENSRNOG00000045829	protein_coding	2893.7	0.684561	0.0884487	7.73964	9.97017e-15	2.3176e-12	2086	2159	2299	4024	3041	3974
Dclk1	ENSRNOG00000032922	protein_coding	1098.1	1.04742	0.136721	7.661	1.84497e-14	4.22272e-12	751	565	797	1552	1283	1735
Mmp14	ENSRNOG00000010947	protein_coding	6679.94	0.828542	0.109199	7.58748	3.26182e-14	7.35243e-12	3940	5194	5090	8539	8026	9715
Nrep	ENSRNOG00000020467	protein_coding	296.866	1.20827	0.160143	7.54498	4.52374e-14	9.89701e-12	171	154	205	412	414	445
Thbs4	ENSRNOG00000012471	protein_coding	245.828	1.27861	0.169642	7.53713	4.8044e-14	1.02107e-11	112	141	173	378	312	385
Slc2a1	ENSRNOG00000007284	protein_coding	1633.52	1.12191	0.148822	7.53858	4.75107e-14	1.02107e-11	824	1177	1034	2033	2122	2713
F5	ENSRNOG00000057855	protein_coding	65.601	2.58887	0.34593	7.48378	7.22157e-14	1.51317e-11	16	22	17	94	111	139
Ndrg2	ENSRNOG00000010389	protein_coding	1202.07	0.725986	0.097952	7.41165	1.24736e-13	2.57735e-11	824	864	988	1561	1386	1667
Brinp2	ENSRNOG00000005592	protein_coding	178.346	1.9013	0.257029	7.39722	1.39065e-13	2.83406e-11	80	72	69	393	281	195
Asphd2	ENSRNOG00000061004	protein_coding	40.4705	3.29866	0.446459	7.3885	1.485e-13	2.98544e-11	8	6	8	75	76	74
Col4a4	ENSRNOG00000014851	protein_coding	520.378	3.82473	0.518752	7.37294	1.66904e-13	3.3107e-11	66	76	59	489	922	1548
Cd14	ENSRNOG00000017819	protein_coding	284.965	1.66899	0.226756	7.36028	1.8352e-13	3.5924e-11	103	167	132	346	429	550
Gpx8	ENSRNOG00000010461	protein_coding	71.4331	3.29565	0.449912	7.3251	2.38715e-13	4.61216e-11	4	24	11	99	114	185	Glutathione Peroxidase 8 (Putative)	Among its related pathways are Detoxification of Reactive Oxygen Species and Aldosterone synthesis and secretion.
Icam1	ENSRNOG00000020679	protein_coding	1363.26	1.325	0.181595	7.2965	2.9536e-13	5.63341e-11	934	561	787	2630	1541	1901
Anxa3	ENSRNOG00000002045	protein_coding	43.179	3.62322	0.49827	7.2716	3.55253e-13	6.60638e-11	9	4	6	57	90	95
Gask1b	ENSRNOG00000010183	protein_coding	76.9536	2.17282	0.298791	7.27203	3.54116e-13	6.60638e-11	29	27	26	121	139	124
Myod1	ENSRNOG00000011306	protein_coding	43.5167	4.6245	0.638068	7.24765	4.24064e-13	7.78863e-11	6	0	4	149	50	66
Col3a1	ENSRNOG00000003357	protein_coding	5391.15	5.0535	0.700151	7.21773	5.28626e-13	9.36235e-11	90	503	348	7053	11658	13011
Myrf	ENSRNOG00000028274	protein_coding	1199.65	1.03599	0.144221	7.18334	6.80281e-13	1.19065e-10	737	759	823	1394	1558	1988
Sertm1	ENSRNOG00000014046	protein_coding	99.7152	1.86358	0.259534	7.1805	6.94576e-13	1.20154e-10	50	39	37	188	135	161
Pltp	ENSRNOG00000016488	protein_coding	630.597	1.04908	0.146643	7.15396	8.43108e-13	1.44171e-10	335	455	423	807	821	981
Crym	ENSRNOG00000061215	protein_coding	3237.68	1.09135	0.155806	7.00457	2.47743e-12	4.18827e-10	1983	1981	2129	3523	4309	5642
Car7	ENSRNOG00000012371	protein_coding	166.356	1.37009	0.195985	6.99079	2.7335e-12	4.56925e-10	95	89	89	292	205	246
Tmsb4x	ENSRNOG00000047931	protein_coding	10196.1	0.616088	0.0883164	6.97592	3.03879e-12	5.02312e-10	6935	8091	8781	12751	11321	13935
Ccdc80	ENSRNOG00000002052	protein_coding	408.129	3.59182	0.517678	6.93833	3.96761e-12	6.48639e-10	46	63	77	365	804	1112
Stmn2	ENSRNOG00000011705	protein_coding	859.723	0.852667	0.12426	6.86196	6.79243e-12	1.09838e-09	552	612	645	1420	973	1037
Gas6	ENSRNOG00000018233	protein_coding	3257.34	0.694489	0.101728	6.82693	8.67524e-12	1.373e-09	2145	2638	2558	4139	3677	4586
Cd44	ENSRNOG00000006094	protein_coding	907.082	0.828078	0.122177	6.77771	1.22099e-11	1.89215e-09	572	580	787	1174	1084	1313
Ecel1	ENSRNOG00000019447	protein_coding	1902.49	0.726993	0.107369	6.77095	1.27936e-11	1.96216e-09	1477	1322	1412	2693	2300	2308
Car2	ENSRNOG00000009629	protein_coding	926.343	0.747943	0.110645	6.75985	1.38133e-11	2.09695e-09	669	658	710	1208	1039	1333
Svep1	ENSRNOG00000033110	protein_coding	392.048	3.02085	0.448216	6.73972	1.58693e-11	2.36088e-09	93	80	79	395	693	1035
Kyat1	ENSRNOG00000016097	protein_coding	1020.37	0.83544	0.125553	6.65409	2.85059e-11	4.15766e-09	617	748	802	1280	1375	1345
Cgnl1	ENSRNOG00000054080	protein_coding	772.57	0.796588	0.119795	6.64958	2.93925e-11	4.24537e-09	526	484	662	1108	842	1084
Avpr1a	ENSRNOG00000004400	protein_coding	78.3524	1.8816	0.283474	6.63765	3.18732e-11	4.5594e-09	32	28	39	134	99	149
Adam33	ENSRNOG00000021242	protein_coding	75.5869	2.70767	0.408055	6.63554	3.23309e-11	4.58083e-09	34	13	11	183	120	103
Adamtsl3	ENSRNOG00000010840	protein_coding	33.0373	3.58172	0.542736	6.59938	4.12881e-11	5.79474e-09	5	6	4	74	37	80
Ptges	ENSRNOG00000006320	protein_coding	109.231	1.65411	0.250746	6.59677	4.20202e-11	5.84237e-09	37	61	58	167	149	195
Lrrk1	ENSRNOG00000012730	protein_coding	391.466	0.872686	0.134223	6.50178	7.93757e-11	1.07352e-08	252	286	277	565	447	552
Anxa8	ENSRNOG00000060949	protein_coding	519.727	1.41361	0.218027	6.48363	8.95426e-11	1.20011e-08	280	201	361	588	712	1014
Tnnt2	ENSRNOG00000033734	protein_coding	101.703	1.55946	0.24072	6.47833	9.27458e-11	1.23195e-08	50	49	53	189	128	154
Gli2	ENSRNOG00000007261	protein_coding	44.0438	7.00892	1.08293	6.47221	9.65798e-11	1.27152e-08	0	2	0	73	74	122
Bgn	ENSRNOG00000055962	protein_coding	892.513	2.53418	0.391816	6.46778	9.9452e-11	1.29785e-08	205	268	307	915	1688	2005
Fam180a	ENSRNOG00000011750	protein_coding	101.508	2.06422	0.320665	6.43731	1.2161e-10	1.57321e-08	39	28	49	113	168	218
Pld1	ENSRNOG00000028156	protein_coding	444.013	0.908923	0.141609	6.41854	1.37587e-10	1.76456e-08	255	315	343	571	557	652
Sema6a	ENSRNOG00000004033	protein_coding	555.776	0.771656	0.120436	6.40719	1.48226e-10	1.88475e-08	376	407	428	728	643	788
Sez6	ENSRNOG00000009350	protein_coding	191.249	1.18743	0.18624	6.37581	1.81998e-10	2.29456e-08	120	112	111	323	243	255
Pgf	ENSRNOG00000005650	protein_coding	1837.43	0.553456	0.0870988	6.35435	2.09316e-10	2.6168e-08	1386	1363	1652	2444	2060	2231
Spata13	ENSRNOG00000013707	protein_coding	139.239	1.87183	0.295041	6.34429	2.23454e-10	2.77027e-08	63	49	64	146	214	307
S100a11	ENSRNOG00000010105	protein_coding	32.9145	4.51488	0.718545	6.28336	3.31337e-10	4.0738e-08	4	4	0	32	58	102
Scrn1	ENSRNOG00000009636	protein_coding	189.383	1.68827	0.269471	6.26514	3.72488e-10	4.50528e-08	104	72	87	205	283	394
Rab9b	ENSRNOG00000047960	protein_coding	129.768	1.77393	0.283562	6.25589	3.95264e-10	4.74221e-08	79	35	58	196	180	242
Setbp1	ENSRNOG00000016208	protein_coding	44.1747	2.41519	0.386246	6.25298	4.02692e-10	4.79267e-08	16	12	13	94	68	68
Postn	ENSRNOG00000012660	protein_coding	22.188	7.88846	1.26238	6.2489	4.13365e-10	4.88066e-08	0	0	0	45	38	54
Fzd1	ENSRNOG00000016242	protein_coding	631.341	0.81413	0.130512	6.23797	4.43278e-10	5.19263e-08	386	515	448	895	741	846
Krt14	ENSRNOG00000003899	protein_coding	35.4711	6.69413	1.08727	6.15683	7.42166e-10	8.4284e-08	0	2	0	92	68	57
Slc36a4	ENSRNOG00000011455	protein_coding	414.984	0.785158	0.127634	6.15162	7.66934e-10	8.64369e-08	270	305	325	601	489	530
Dyrk2	ENSRNOG00000007821	protein_coding	740.481	0.69461	0.113137	6.13956	8.2749e-10	9.25606e-08	479	571	623	975	828	1020
Nmnat2	ENSRNOG00000027697	protein_coding	290.613	1.20115	0.195744	6.13631	8.44605e-10	9.377e-08	184	170	163	548	375	331
Nuak1	ENSRNOG00000008061	protein_coding	494.756	0.99268	0.161982	6.12833	8.88089e-10	9.78674e-08	268	371	338	633	579	817
Syp	ENSRNOG00000059720	protein_coding	1811.76	0.871511	0.14237	6.12145	9.27272e-10	1.00694e-07	1392	1093	1276	2908	2297	2018
Itga1	ENSRNOG00000053550	protein_coding	2340.93	0.582765	0.0959243	6.07526	1.23786e-09	1.33446e-07	1863	1624	2044	3080	2551	3029
Tspan9	ENSRNOG00000051620	protein_coding	1789.04	0.775512	0.127788	6.06872	1.28936e-09	1.37998e-07	1033	1503	1362	2292	2179	2468
Arhgef6	ENSRNOG00000000869	protein_coding	93.4853	1.9103	0.315221	6.06019	1.35957e-09	1.44474e-07	49	20	47	193	122	144
Trim9	ENSRNOG00000007031	protein_coding	109.282	1.93185	0.319989	6.03723	1.56784e-09	1.64259e-07	57	31	45	122	186	218
LOC292543	ENSRNOG00000054438	protein_coding	29.315	3.18539	0.529094	6.02047	1.73911e-09	1.79672e-07	6	7	4	44	55	62
Csdc2	ENSRNOG00000005332	protein_coding	454.58	1.23015	0.204948	6.00222	1.94634e-09	1.96977e-07	228	281	294	467	679	793
Vegfd	ENSRNOG00000003587	protein_coding	1043.46	1.0452	0.174125	6.00263	1.94151e-09	1.96977e-07	498	711	816	1172	1387	1741
Ngef	ENSRNOG00000016653	protein_coding	774.909	0.74159	0.123697	5.99524	2.03189e-09	2.03753e-07	453	608	658	1047	921	1018
Armcx2	ENSRNOG00000025705	protein_coding	2291.74	0.592902	0.0989071	5.99454	2.04068e-09	2.03753e-07	1601	1789	2013	2747	2659	3059
Pimreg	ENSRNOG00000008040	protein_coding	141.439	1.46893	0.245178	5.99128	2.08201e-09	2.06493e-07	52	92	78	193	190	256
Tnfrsf26	ENSRNOG00000043486	protein_coding	30.0826	3.77749	0.631272	5.98393	2.17817e-09	2.146e-07	6	2	4	32	52	87
Slitrk2	ENSRNOG00000011562	protein_coding	68.744	1.72983	0.28953	5.9746	2.30661e-09	2.2576e-07	30	30	34	128	100	98
Fn1	ENSRNOG00000014288	protein_coding	1063.69	1.13199	0.1897	5.96723	2.41311e-09	2.33634e-07	647	585	737	2268	1153	1149
Lrp1	ENSRNOG00000025053	protein_coding	3694.81	0.722331	0.121057	5.96687	2.41847e-09	2.33634e-07	2228	3239	2758	5097	4356	4718
Igfbp4	ENSRNOG00000010635	protein_coding	885.852	0.833301	0.139692	5.96528	2.44217e-09	2.34401e-07	550	691	636	1057	1078	1348
Serpina9	ENSRNOG00000042391	protein_coding	21.3947	7.83411	1.33178	5.88241	4.04324e-09	3.7831e-07	0	0	0	16	40	74
Prdm6	ENSRNOG00000030486	protein_coding	21.3577	7.8309	1.33254	5.87668	4.18567e-09	3.89189e-07	0	0	0	15	45	69
Emp1	ENSRNOG00000008676	protein_coding	2918.16	0.634307	0.108188	5.86302	4.54527e-09	4.17407e-07	2198	2090	2460	3719	2975	4280
Sh3bp5	ENSRNOG00000052391	protein_coding	755.387	0.649408	0.110984	5.85137	4.8755e-09	4.44986e-07	578	575	577	1015	840	990
Akap5	ENSRNOG00000006410	protein_coding	242.366	1.24444	0.21329	5.8345	5.39524e-09	4.89421e-07	165	101	158	402	258	400
Rgl1	ENSRNOG00000002347	protein_coding	632.882	0.652805	0.112684	5.79322	6.90485e-09	6.22566e-07	478	451	522	831	728	823
Antxr1	ENSRNOG00000008678	protein_coding	988.706	0.630073	0.108858	5.78802	7.12193e-09	6.38271e-07	665	715	922	1297	1102	1305
Casq2	ENSRNOG00000016243	protein_coding	30.8197	3.67873	0.638346	5.76291	8.26742e-09	7.3211e-07	6	5	2	34	41	101
C1qtnf1	ENSRNOG00000003259	protein_coding	4581.55	0.696212	0.120858	5.76059	8.38227e-09	7.37888e-07	3269	3329	3720	5091	5533	6734
Lpcat2	ENSRNOG00000016643	protein_coding	52.072	2.37065	0.412397	5.74846	9.00584e-09	7.88117e-07	20	8	22	130	74	68
Fst	ENSRNOG00000011631	protein_coding	16.9361	7.49444	1.3075	5.73187	9.93289e-09	8.59137e-07	0	0	0	22	42	38
Apoe	ENSRNOG00000018454	protein_coding	104.946	1.68786	0.294855	5.72436	1.03822e-08	8.9281e-07	33	61	53	153	196	137
Col8a2	ENSRNOG00000010841	protein_coding	676.373	0.670046	0.117427	5.70608	1.15606e-08	9.88434e-07	467	554	517	959	760	845
Lamb3	ENSRNOG00000006025	protein_coding	55.6963	2.24388	0.394397	5.68939	1.27491e-08	1.06556e-06	7	25	26	85	92	105
Loxl2	ENSRNOG00000016758	protein_coding	4452.97	0.534995	0.0940337	5.68939	1.27492e-08	1.06556e-06	3014	3777	3967	5794	5110	5307
Shisal1	ENSRNOG00000052725	protein_coding	663.656	0.957932	0.169125	5.66404	1.47847e-08	1.22878e-06	370	452	515	1222	786	712
Zfpm2	ENSRNOG00000004109	protein_coding	371.403	0.802109	0.142691	5.62132	1.89508e-08	1.55763e-06	276	236	286	561	424	474
Grin2c	ENSRNOG00000003280	protein_coding	2383.85	0.829018	0.147785	5.60961	2.02786e-08	1.6576e-06	1320	2038	1710	2868	2957	3531
Chst4	ENSRNOG00000016953	protein_coding	14.8425	7.31126	1.30676	5.59496	2.20675e-08	1.79398e-06	0	0	0	40	20	33
Tmtc2	ENSRNOG00000004585	protein_coding	65.3476	2.05576	0.368462	5.57929	2.41504e-08	1.95264e-06	33	19	22	76	113	131
Tmem178a	ENSRNOG00000007907	protein_coding	94.1802	1.60622	0.288779	5.56211	2.66533e-08	2.14336e-06	61	37	38	173	113	154
Mest	ENSRNOG00000048088	protein_coding	2356.23	1.66115	0.299774	5.54136	3.00137e-08	2.40061e-06	1063	1047	1233	2523	3355	5069
Wnt5a	ENSRNOG00000015618	protein_coding	1117.32	0.557251	0.100668	5.53554	3.10264e-08	2.46834e-06	832	875	961	1479	1314	1298
Snai2	ENSRNOG00000047699	protein_coding	88.9704	1.46737	0.265541	5.52598	3.27648e-08	2.59277e-06	41	56	42	142	110	152
Robo1	ENSRNOG00000029614	protein_coding	1026.66	0.528956	0.0958484	5.51867	3.4158e-08	2.67457e-06	772	812	897	1304	1114	1320
Fgf18	ENSRNOG00000048389	protein_coding	27.7623	4.32094	0.78408	5.51084	3.57134e-08	2.78172e-06	0	2	6	25	37	101
Nrsn1	ENSRNOG00000017444	protein_coding	148.078	1.22843	0.223501	5.4963	3.87834e-08	3.0051e-06	105	78	76	219	197	222
P2ry2	ENSRNOG00000019283	protein_coding	141.821	1.36607	0.249957	5.46521	4.62349e-08	3.52737e-06	86	91	54	242	176	214
Galnt18	ENSRNOG00000017021	protein_coding	855.443	0.858726	0.157472	5.45319	4.94752e-08	3.75532e-06	446	682	674	1028	1144	1200
Tubb2a	ENSRNOG00000017558	protein_coding	462.772	0.915608	0.169419	5.4044	6.50257e-08	4.91059e-06	273	393	275	648	582	630
Itga5	ENSRNOG00000057451	protein_coding	710.615	0.632423	0.117548	5.38012	7.44344e-08	5.56463e-06	463	576	610	1002	744	928
Plod2	ENSRNOG00000030183	protein_coding	1677.67	0.835913	0.156178	5.35231	8.68398e-08	6.39562e-06	1104	1115	1343	1823	1915	2870
Insyn1	ENSRNOG00000026238	protein_coding	3041.78	0.788121	0.147693	5.33619	9.49191e-08	6.92212e-06	1596	2722	2278	4033	3736	4071
Arhgap24	ENSRNOG00000056944	protein_coding	24.0611	7.03049	1.32228	5.31693	1.05534e-07	7.65866e-06	0	1	0	16	52	76
Fstl1	ENSRNOG00000002746	protein_coding	4581.29	0.432062	0.0817308	5.28641	1.24742e-07	9.00868e-06	3566	3674	4287	5841	4566	5860
Scn3a	ENSRNOG00000005007	protein_coding	79.2808	1.51803	0.287425	5.2815	1.28132e-07	9.2088e-06	37	32	53	157	95	114
Mpzl2	ENSRNOG00000016085	protein_coding	57.8525	1.93627	0.366704	5.28021	1.29039e-07	9.22942e-06	14	31	26	75	88	118
Epha4	ENSRNOG00000013213	protein_coding	324.106	0.79235	0.150371	5.2693	1.36944e-07	9.74793e-06	240	221	237	421	377	467
Slc13a4	ENSRNOG00000011184	protein_coding	18.0847	5.13268	0.980908	5.23258	1.6716e-07	1.18421e-05	0	0	3	34	35	39
Zp2	ENSRNOG00000057989	protein_coding	68.8381	6.6338	1.26801	5.23167	1.67986e-07	1.18442e-05	0	4	0	73	123	220
Lrrfip1	ENSRNOG00000019892	protein_coding	1807.77	0.46043	0.0883237	5.21298	1.85829e-07	1.30405e-05	1418	1383	1697	2284	1914	2259
Mbnl3	ENSRNOG00000002487	protein_coding	12.6315	7.07794	1.36014	5.20383	1.95221e-07	1.36352e-05	0	0	0	22	13	44
Prrg4	ENSRNOG00000022710	protein_coding	532.537	0.874137	0.168335	5.19283	2.07117e-07	1.43985e-05	387	335	384	593	662	856
Ror2	ENSRNOG00000053232	protein_coding	77.612	1.6777	0.323756	5.182	2.19522e-07	1.51478e-05	26	49	34	162	112	92
Antxr2	ENSRNOG00000000081	protein_coding	311.412	0.807442	0.155827	5.18165	2.19932e-07	1.51478e-05	228	197	243	425	337	463
Cxcl14	ENSRNOG00000011984	protein_coding	1273.62	0.747623	0.144697	5.1668	2.38134e-07	1.63259e-05	859	1047	888	1447	1668	1761
Cabp7	ENSRNOG00000057703	protein_coding	361.024	0.959803	0.186045	5.15897	2.48307e-07	1.69453e-05	176	305	243	557	463	449
Jam2	ENSRNOG00000042848	protein_coding	1025.84	2.1344	0.413924	5.1565	2.51602e-07	1.7014e-05	351	343	432	1011	1484	2616
Vipr2	ENSRNOG00000004317	protein_coding	41.9303	2.34834	0.455538	5.1551	2.53494e-07	1.70644e-05	20	12	8	108	54	57
Rasef	ENSRNOG00000024190	protein_coding	49.8797	1.99948	0.390468	5.12074	3.04341e-07	2.01836e-05	26	20	12	103	77	66
Cdc42ep2	ENSRNOG00000020904	protein_coding	128.855	1.49868	0.292749	5.11934	3.06614e-07	2.01836e-05	43	79	78	141	184	257
Sh3tc1	ENSRNOG00000007993	protein_coding	411.604	0.726468	0.141885	5.12011	3.05363e-07	2.01836e-05	324	296	290	569	483	528
Cavin2	ENSRNOG00000025895	protein_coding	19.458	4.18811	0.822902	5.08944	3.59128e-07	2.35363e-05	0	4	2	25	26	63
Zdhhc22	ENSRNOG00000011285	protein_coding	51.0305	1.80437	0.355101	5.0813	3.74868e-07	2.43533e-05	20	23	24	94	88	61
Fbxl7	ENSRNOG00000024433	protein_coding	30.6835	2.38581	0.473083	5.04311	4.58017e-07	2.94975e-05	12	6	11	44	55	58
Ndufa4l2	ENSRNOG00000031851	protein_coding	942.957	0.825128	0.164726	5.00909	5.46891e-07	3.49188e-05	594	627	795	976	1288	1408
Zcchc24	ENSRNOG00000040205	protein_coding	561.504	0.784258	0.15656	5.00933	5.46212e-07	3.49188e-05	325	483	409	708	649	830
Lcp1	ENSRNOG00000010319	protein_coding	33.2075	8.46978	1.69158	5.00701	5.52815e-07	3.51463e-05	0	0	0	19	51	133
Doxl2	ENSRNOG00000032432	protein_coding	16.4482	6.47811	1.30016	4.98254	6.27543e-07	3.93922e-05	0	0	1	23	35	41
Stc1	ENSRNOG00000015075	protein_coding	125.536	1.33906	0.269465	4.96934	6.71815e-07	4.19941e-05	83	62	63	143	182	224
Jup	ENSRNOG00000015380	protein_coding	2578.72	0.677948	0.136541	4.96516	6.86444e-07	4.2729e-05	1658	2353	1822	3189	3115	3436
Cyp4v3	ENSRNOG00000042426	protein_coding	9.88868	6.72221	1.35582	4.95802	7.12146e-07	4.41441e-05	0	0	0	24	19	18
Frmd4b	ENSRNOG00000007764	protein_coding	51.7715	7.23316	1.45959	4.95561	7.2102e-07	4.45088e-05	0	2	0	30	103	178
F3	ENSRNOG00000011800	protein_coding	1334.11	2.13696	0.431342	4.9542	7.26284e-07	4.46485e-05	469	499	486	1264	1951	3428
Cdk6	ENSRNOG00000009258	protein_coding	144.647	1.1246	0.227399	4.94551	7.59465e-07	4.64961e-05	82	84	103	176	177	257
Lmo7	ENSRNOG00000060775	protein_coding	728.989	0.619954	0.125463	4.94135	7.75837e-07	4.73038e-05	508	555	637	949	727	1058
Cldn6	ENSRNOG00000003648	protein_coding	58.5983	1.66906	0.337885	4.93974	7.8228e-07	4.7502e-05	28	34	20	97	71	108
Cdh1	ENSRNOG00000020151	protein_coding	3360.53	0.612915	0.124208	4.9346	8.0316e-07	4.85716e-05	2524	2359	2970	3758	3742	4988
Lhfpl2	ENSRNOG00000011032	protein_coding	102.606	1.19243	0.242274	4.92184	8.57351e-07	5.16389e-05	51	65	69	182	114	148
Lsamp	ENSRNOG00000031852	protein_coding	79.4729	1.63803	0.334161	4.90192	9.4904e-07	5.69309e-05	21	46	48	101	143	121
Gjb2	ENSRNOG00000008855	protein_coding	42.1435	2.38611	0.487462	4.89497	9.83205e-07	5.87436e-05	19	3	18	63	60	95
Kank4	ENSRNOG00000007779	protein_coding	347.749	0.706388	0.144966	4.8728	1.1003e-06	6.53064e-05	233	279	267	443	402	482
Tsku	ENSRNOG00000027784	protein_coding	497.935	0.616917	0.126612	4.87252	1.10183e-06	6.53064e-05	344	373	446	616	581	656
Tent5a	ENSRNOG00000010240	protein_coding	292.112	0.872582	0.179776	4.85371	1.21174e-06	7.09724e-05	210	187	210	333	385	437
Bcam	ENSRNOG00000029399	protein_coding	3965.26	0.527267	0.109226	4.8273	1.38398e-06	8.04278e-05	2674	3635	3275	4985	4430	4994
Susd2	ENSRNOG00000033389	protein_coding	119.989	1.17267	0.243155	4.8227	1.4163e-06	8.19744e-05	69	79	69	179	124	213
Calcb	ENSRNOG00000011074	protein_coding	87.7738	1.37652	0.286444	4.80556	1.54319e-06	8.86412e-05	56	32	56	157	122	112
Dlc1	ENSRNOG00000010780	protein_coding	31.6813	2.07392	0.43399	4.77873	1.7641e-06	0.000100941	10	12	14	50	44	64
Spats2l	ENSRNOG00000016012	protein_coding	14.2784	4.33003	0.908774	4.76469	1.89143e-06	0.000107811	2	0	2	34	26	24
Vav3	ENSRNOG00000020485	protein_coding	349.78	1.11489	0.237061	4.70296	2.56415e-06	0.000143409	184	231	238	316	501	638
Vtcn1	ENSRNOG00000015279	protein_coding	268.014	1.27656	0.272109	4.69137	2.71387e-06	0.000151214	137	143	184	227	377	551
Kcnq3	ENSRNOG00000005206	protein_coding	71.0277	1.63256	0.348199	4.68858	2.75106e-06	0.00015221	48	25	28	150	96	87
Tpcn1	ENSRNOG00000059344	protein_coding	1106.98	0.476575	0.101648	4.6885	2.7522e-06	0.00015221	788	931	1020	1470	1122	1392
Il22ra1	ENSRNOG00000027976	protein_coding	37.6729	2.9098	0.621955	4.67848	2.89013e-06	0.000158659	10	7	9	17	66	118
Sema6d	ENSRNOG00000004812	protein_coding	55.4164	1.95726	0.422646	4.63098	3.63944e-06	0.00019833	31	8	28	127	70	78
Sftpd	ENSRNOG00000056001	protein_coding	8.93296	6.57559	1.42255	4.6224	3.79333e-06	0.000204469	0	0	0	10	13	32
Plagl1	ENSRNOG00000025587	protein_coding	75.814	3.96678	0.859862	4.61327	3.96388e-06	0.00021146	2	17	8	72	127	236
Bhlhe40	ENSRNOG00000007152	protein_coding	1678.23	0.452712	0.0981346	4.61317	3.96568e-06	0.00021146	1194	1359	1648	2105	1758	2120
Phospho1	ENSRNOG00000005569	protein_coding	382.571	0.824955	0.179366	4.59928	4.23959e-06	0.000224457	233	344	233	540	454	513
Egln3	ENSRNOG00000005053	protein_coding	860.51	0.560624	0.122151	4.5896	4.44102e-06	0.000233841	582	701	775	1015	954	1186
Adcy5	ENSRNOG00000002229	protein_coding	572.754	0.557718	0.121595	4.58669	4.50338e-06	0.000235904	403	464	502	734	684	677
Robo2	ENSRNOG00000029598	protein_coding	364.591	0.73739	0.161829	4.55659	5.19915e-06	0.000271396	253	212	347	493	416	497
Smim3	ENSRNOG00000019536	protein_coding	449.424	0.664076	0.146043	4.54713	5.43824e-06	0.000282883	276	371	382	548	546	597
Tmem144	ENSRNOG00000010081	protein_coding	13.703	5.28567	1.16631	4.53197	5.84371e-06	0.000300819	2	0	0	26	25	31
Pcnx1	ENSRNOG00000007459	protein_coding	5609.45	0.436746	0.0963628	4.53231	5.83428e-06	0.000300819	3957	5045	5088	6745	6113	6991
Tspy26	ENSRNOG00000026770	protein_coding	22.4886	2.40066	0.529844	4.53088	5.87396e-06	0.000301334	9	6	6	42	31	44
AABR07051450.1	ENSRNOG00000049056	protein_coding	208.585	0.937028	0.207494	4.51594	6.30374e-06	0.000321167	114	164	144	252	305	278
Niban1	ENSRNOG00000002403	protein_coding	54.8413	1.39978	0.3108	4.5038	6.67476e-06	0.000336611	28	29	32	96	71	79
Itga11	ENSRNOG00000006723	protein_coding	294.144	0.784951	0.174286	4.50381	6.67464e-06	0.000336611	221	193	222	467	363	318
Dapk2	ENSRNOG00000017332	protein_coding	171.12	0.855637	0.191196	4.47519	7.63442e-06	0.000382415	111	105	145	270	199	213
Ptn	ENSRNOG00000011946	protein_coding	4913.27	0.565583	0.126652	4.46564	7.9828e-06	0.000397191	3578	3693	4450	5238	5531	7222
Bcar3	ENSRNOG00000013737	protein_coding	327.863	0.701746	0.15747	4.45637	8.33602e-06	0.000410645	237	238	261	389	371	489
Arhgap29	ENSRNOG00000012563	protein_coding	1972.76	0.611695	0.137335	4.45403	8.42715e-06	0.000413764	1571	1305	1731	2255	2098	2992
Gpr85	ENSRNOG00000024636	protein_coding	21.9845	2.73247	0.615065	4.44257	8.88899e-06	0.000432162	6	5	6	70	24	27
Ifitm3	ENSRNOG00000015078	protein_coding	167.057	1.19362	0.269333	4.43175	9.34694e-06	0.00044712	76	113	112	174	201	339
Cd82	ENSRNOG00000000047	protein_coding	1340.24	0.745594	0.168233	4.43192	9.33977e-06	0.00044712	816	1106	1035	1363	1643	2129
Efnb3	ENSRNOG00000010320	protein_coding	362.272	0.665579	0.150143	4.43297	9.29437e-06	0.00044712	248	299	278	442	449	471
Hopx	ENSRNOG00000024689	protein_coding	163.951	0.940324	0.212642	4.4221	9.7748e-06	0.000464599	117	112	100	205	231	222
Rbm20	ENSRNOG00000014705	protein_coding	175.295	0.821055	0.185752	4.42017	9.86244e-06	0.000467272	125	112	137	243	191	258
Dnm3	ENSRNOG00000026490	protein_coding	511.367	0.612178	0.139517	4.38784	1.1448e-05	0.000533891	330	371	501	641	577	686
Nav1	ENSRNOG00000008425	protein_coding	1059.48	0.644978	0.147716	4.36635	1.26342e-05	0.000587374	682	958	794	1213	1302	1442
Unc5cl	ENSRNOG00000046601	protein_coding	72.9037	7.72458	1.76979	4.36469	1.273e-05	0.000589984	0	2	0	16	147	274
Gria2	ENSRNOG00000054204	protein_coding	440.227	0.846051	0.194828	4.34255	1.40839e-05	0.000644697	371	204	352	649	511	587
Ms4a7	ENSRNOG00000020953	protein_coding	49.4956	1.84563	0.425224	4.34037	1.42245e-05	0.000649135	16	10	39	73	68	98
Acly	ENSRNOG00000016924	protein_coding	13147.5	0.378285	0.0875218	4.32218	1.54497e-05	0.000698617	9552	11593	12700	16089	14423	15191
Myo7a	ENSRNOG00000013641	protein_coding	46.1685	1.58217	0.366153	4.32107	1.55272e-05	0.000699993	19	29	20	70	56	88
Iqsec3	ENSRNOG00000014083	protein_coding	74.0624	1.27614	0.296261	4.3075	1.65113e-05	0.000742108	45	32	51	136	100	88
Smpd5	ENSRNOG00000037299	protein_coding	338.818	0.727465	0.169178	4.30001	1.70789e-05	0.000765308	257	252	240	389	402	505
Lrrn4	ENSRNOG00000032989	protein_coding	7.38097	6.29472	1.46739	4.28974	1.78881e-05	0.00079203	0	0	0	6	20	18
Ets1	ENSRNOG00000008941	protein_coding	653.487	0.510969	0.119601	4.27229	1.93475e-05	0.000851576	485	502	608	882	636	862
Tnfsf18	ENSRNOG00000026607	protein_coding	136.64	2.65121	0.621164	4.26813	1.97116e-05	0.000862499	65	18	25	191	214	318
Notch1	ENSRNOG00000019322	protein_coding	418.925	0.660486	0.154799	4.26674	1.98354e-05	0.000865369	244	364	353	542	505	530
B3gat1	ENSRNOG00000007142	protein_coding	185.396	0.85813	0.201216	4.26471	2.00159e-05	0.000870692	118	131	140	212	227	294
Mx2	ENSRNOG00000001963	protein_coding	223.001	0.7899	0.185286	4.26315	2.01565e-05	0.000872214	169	123	191	302	274	293
Tet1	ENSRNOG00000000277	protein_coding	107.495	1.05326	0.247155	4.26154	2.03021e-05	0.000875464	62	55	91	172	114	165
Kcnk1	ENSRNOG00000019937	protein_coding	197.572	0.734124	0.172295	4.26085	2.03654e-05	0.000875653	143	141	153	264	245	249
Mtss1	ENSRNOG00000009001	protein_coding	4602.6	0.386812	0.0912804	4.23762	2.25897e-05	0.00096571	3492	4106	4177	5382	4833	5842
Pgm2	ENSRNOG00000002185	protein_coding	867.464	0.652448	0.154294	4.22862	2.35133e-05	0.000996602	613	595	790	914	1027	1307
Hcn4	ENSRNOG00000009450	protein_coding	593.423	0.676643	0.160044	4.22787	2.35915e-05	0.000997077	340	542	468	890	674	692
Epas1	ENSRNOG00000021318	protein_coding	3617.62	0.456768	0.108226	4.22049	2.43772e-05	0.00102736	3082	2871	3011	4905	4118	3862
Dact1	ENSRNOG00000008445	protein_coding	136.447	1.06453	0.252268	4.21985	2.44465e-05	0.00102737	82	112	64	225	155	192
Coro6	ENSRNOG00000014496	protein_coding	353.362	0.733124	0.174273	4.20676	2.5906e-05	0.00108564	289	253	235	421	414	520
Ldlrad4	ENSRNOG00000016879	protein_coding	574.809	0.569818	0.135477	4.206	2.59929e-05	0.00108622	396	453	520	656	696	752
Ihh	ENSRNOG00000018059	protein_coding	23.8416	2.27724	0.543158	4.19259	2.75783e-05	0.00114925	4	14	6	43	35	44
Fbn1	ENSRNOG00000007302	protein_coding	3421.54	0.360612	0.0860513	4.19067	2.78136e-05	0.00115582	2568	2981	3315	4106	3539	4210
Tceal7	ENSRNOG00000037645	protein_coding	45.8766	1.84479	0.441192	4.18138	2.89748e-05	0.00120072	28	18	12	116	52	57
Plce1	ENSRNOG00000014276	protein_coding	6.37879	6.08819	1.46128	4.16633	3.09539e-05	0.00127563	0	0	0	9	12	18
Septin9	ENSRNOG00000002807	protein_coding	1113.28	0.41152	0.0994599	4.13754	3.51048e-05	0.00144269	857	988	972	1388	1162	1369
Tnfaip8l3	ENSRNOG00000024230	protein_coding	11.5409	4.00327	0.97068	4.12419	3.72038e-05	0.00152474	2	0	2	14	23	29
Pard3b	ENSRNOG00000024345	protein_coding	329.125	0.647204	0.156976	4.12295	3.74048e-05	0.00152877	207	232	324	442	359	440
Ptgfrn	ENSRNOG00000015655	protein_coding	16346.3	0.317814	0.0772051	4.11649	3.84681e-05	0.00156792	12498	14554	15994	19740	16658	19525
Calml4	ENSRNOG00000038202	protein_coding	117.911	0.933762	0.22687	4.11585	3.8575e-05	0.00156798	72	83	84	147	142	187
Dgkk	ENSRNOG00000039323	protein_coding	33.2785	1.80267	0.438819	4.10801	3.99082e-05	0.00161775	14	12	18	79	39	44
Efhd2	ENSRNOG00000013783	protein_coding	676.684	0.530501	0.129338	4.10168	4.10164e-05	0.00165816	442	608	587	886	702	883
Rgs3	ENSRNOG00000024501	protein_coding	338.234	0.687124	0.167575	4.10039	4.1246e-05	0.0016601	210	281	275	511	412	363
Entpd4	ENSRNOG00000016321	protein_coding	1874.08	0.51805	0.126349	4.10015	4.12878e-05	0.0016601	1546	1399	1593	2129	1937	2734
Tmem200c	ENSRNOG00000049880	protein_coding	123.108	0.983405	0.241519	4.07175	4.66618e-05	0.00187112	85	78	80	205	168	130
Ehd2	ENSRNOG00000011346	protein_coding	1613.69	0.672418	0.165457	4.06401	4.82364e-05	0.00191363	877	1562	1237	1982	1817	2305
Pml	ENSRNOG00000008400	protein_coding	1440.04	0.484435	0.11939	4.05758	4.95842e-05	0.00195667	998	1363	1177	1837	1573	1764
Kng1	ENSRNOG00000030387	protein_coding	6.20181	6.04331	1.49516	4.04192	5.30145e-05	0.0020865	0	0	0	6	17	14
Nek6	ENSRNOG00000010897	protein_coding	589.331	0.488877	0.121278	4.03103	5.55318e-05	0.00217407	443	504	499	754	593	780
Birc7	ENSRNOG00000043311	protein_coding	30.327	1.70374	0.422761	4.03003	5.57689e-05	0.00217762	12	16	14	53	44	46
Kcnd3	ENSRNOG00000014686	protein_coding	1704.85	0.471793	0.117434	4.01752	5.8815e-05	0.00229055	1487	1192	1531	2274	1669	2192
Pde4b	ENSRNOG00000005905	protein_coding	19.3808	2.85116	0.720447	3.95749	7.57399e-05	0.00290408	4	4	6	15	22	68
Gstt1	ENSRNOG00000049771	protein_coding	249.709	0.644278	0.162876	3.95565	7.63272e-05	0.00291907	165	208	202	312	294	330
Matn2	ENSRNOG00000006060	protein_coding	43.6572	1.4549	0.368305	3.95025	7.80693e-05	0.00297804	18	26	25	58	56	83
Npc1	ENSRNOG00000012016	protein_coding	2437.53	0.325505	0.0824557	3.94763	7.89277e-05	0.00300309	1979	2075	2336	2934	2439	2992
Arhgdib	ENSRNOG00000005809	protein_coding	47.1925	1.75852	0.446303	3.94019	8.14172e-05	0.00308991	14	12	39	53	78	91
Plxna2	ENSRNOG00000007324	protein_coding	1750.31	0.41324	0.104976	3.93651	8.26762e-05	0.0031297	1331	1450	1658	1987	1844	2321
Hrh3	ENSRNOG00000061153	protein_coding	106.854	0.884955	0.225015	3.93287	8.3936e-05	0.00316131	73	73	75	160	133	134
Igf2bp2	ENSRNOG00000025946	protein_coding	22.3936	3.46617	0.881718	3.93116	8.45377e-05	0.00317593	0	8	3	8	34	83
Aldh1a3	ENSRNOG00000052070	protein_coding	79.8704	1.01715	0.259118	3.92543	8.65763e-05	0.00324432	49	48	59	107	107	114
Ly6e	ENSRNOG00000007091	protein_coding	6243.19	0.363652	0.0929855	3.91084	9.19742e-05	0.00343794	4963	5270	5894	7001	6533	8077
Npy	ENSRNOG00000046449	protein_coding	44.5201	1.78873	0.457483	3.90994	9.23173e-05	0.00344212	21	26	11	84	86	40
Trib2	ENSRNOG00000004110	protein_coding	10.1466	3.78026	0.967275	3.90815	9.30055e-05	0.00345911	2	2	0	19	18	21
Castor1	ENSRNOG00000006740	protein_coding	21.5213	2.08111	0.53266	3.90701	9.34445e-05	0.00346677	10	8	6	32	38	36
Rapgef4	ENSRNOG00000001516	protein_coding	36.3099	1.68459	0.431967	3.89981	9.627e-05	0.00355387	10	23	18	46	51	73
Ldb3	ENSRNOG00000059166	protein_coding	143.85	0.995264	0.255269	3.89888	9.66397e-05	0.00355868	118	79	84	265	164	166
Tspan5	ENSRNOG00000015913	protein_coding	1530.16	0.355946	0.0913362	3.8971	9.73503e-05	0.003576	1293	1214	1455	1901	1556	1844
Csrp2	ENSRNOG00000003772	protein_coding	244.118	0.836349	0.2148	3.89361	9.87627e-05	0.00361281	154	171	193	245	298	415
Sh3kbp1	ENSRNOG00000004322	protein_coding	925.32	0.626089	0.160807	3.89343	9.88381e-05	0.00361281	705	616	830	945	1097	1395
Chrm4	ENSRNOG00000017556	protein_coding	7432.76	0.413658	0.10627	3.89252	9.92073e-05	0.00361742	5307	6997	6507	8678	8217	9190
Nrp2	ENSRNOG00000031232	protein_coding	4335.22	0.566627	0.145878	3.88424	0.00010265	0.00372468	2824	3711	3806	4407	5025	6414
Camkv	ENSRNOG00000058938	protein_coding	275.672	0.593745	0.153094	3.8783	0.000105189	0.00380754	182	226	242	353	306	363
Myo5b	ENSRNOG00000014104	protein_coding	5.6181	5.90864	1.52851	3.86563	0.000110801	0.00393465	0	0	0	8	6	21
AABR07007032.1	ENSRNOG00000046333	protein_coding	298.367	0.885282	0.229015	3.8656	0.000110817	0.00393465	242	128	249	387	323	486
Oplah	ENSRNOG00000011781	protein_coding	773.626	0.502589	0.13001	3.86577	0.000110737	0.00393465	600	680	601	900	867	1019
Igsf3	ENSRNOG00000023851	protein_coding	1550.19	0.404481	0.104632	3.86575	0.000110747	0.00393465	1103	1414	1427	1875	1683	1876
Abr	ENSRNOG00000056837	protein_coding	2577.78	0.32779	0.0848324	3.86397	0.000111559	0.00395157	2056	2243	2452	3003	2710	3116
Ntng2	ENSRNOG00000013694	protein_coding	233.124	0.747087	0.193702	3.85688	0.000114843	0.00405826	153	173	188	249	290	355
Lpar3	ENSRNOG00000015260	protein_coding	321.379	0.552349	0.14346	3.85018	0.000118029	0.00415109	217	256	299	417	349	413
Lrp4	ENSRNOG00000015285	protein_coding	597.571	0.540208	0.140335	3.84941	0.000118403	0.00415445	407	502	531	672	664	840
Bcat1	ENSRNOG00000015514	protein_coding	401.952	0.507942	0.132575	3.83134	0.000127446	0.00446122	307	331	340	488	460	502
AABR07025295.1	ENSRNOG00000010107	protein_coding	42.5835	1.53568	0.401025	3.8294	0.000128457	0.00448606	16	32	16	71	67	56
Hs6st1	ENSRNOG00000014516	protein_coding	1420.45	0.372171	0.0978237	3.80451	0.000142087	0.00493885	1049	1290	1320	1790	1448	1709
Rgs2	ENSRNOG00000003687	protein_coding	189.79	0.670741	0.176988	3.78974	0.000150803	0.00520532	140	134	158	235	227	254
Mfap5	ENSRNOG00000015505	protein_coding	557.66	0.469269	0.124323	3.77459	0.00016027	0.00550654	463	435	480	733	546	725
Maoa	ENSRNOG00000002848	protein_coding	3740.37	0.548914	0.145696	3.76753	0.00016487	0.00565154	2936	2782	3240	3760	4117	5753
Rgs7bp	ENSRNOG00000013389	protein_coding	46.8747	1.36046	0.361545	3.76291	0.000167949	0.00573067	23	23	32	97	58	55
Cdh2	ENSRNOG00000015602	protein_coding	5040.15	0.349508	0.0930883	3.75458	0.000173632	0.00591103	4125	4060	4915	5720	5205	6459
Sctr	ENSRNOG00000049766	protein_coding	176.166	0.690887	0.184357	3.74756	0.000178562	0.00605117	135	131	130	230	215	223
Ano5	ENSRNOG00000015972	protein_coding	131.841	0.922275	0.246402	3.74297	0.000181857	0.00614883	108	62	98	182	148	203
Hsd11b1	ENSRNOG00000005861	protein_coding	309.94	1.68139	0.451535	3.72373	0.000196299	0.00658557	110	151	177	277	419	749
Nynrin	ENSRNOG00000048431	protein_coding	690.558	0.399727	0.107355	3.72342	0.000196544	0.00658557	528	573	660	865	706	854
Osbp2	ENSRNOG00000019645	protein_coding	638.942	0.467622	0.125955	3.71262	0.000205124	0.00682691	437	579	569	787	684	814
AABR07031193.1	ENSRNOG00000011300	protein_coding	239.383	0.756917	0.204097	3.70861	0.000208399	0.00692044	208	163	149	384	252	297
S100a4	ENSRNOG00000011821	protein_coding	1861.85	0.365271	0.0985282	3.70727	0.000209505	0.00694167	1398	1584	1835	2248	2097	2093
Deptor	ENSRNOG00000004328	protein_coding	210.482	1.06544	0.287653	3.70389	0.000212317	0.00700365	128	132	141	162	294	409
Tgm5	ENSRNOG00000058755	protein_coding	20.8836	2.19945	0.595594	3.69287	0.000221738	0.0072821	7	7	8	18	36	50
Arhgap6	ENSRNOG00000003956	protein_coding	37.358	1.8325	0.49708	3.68652	0.000227344	0.00740771	27	14	6	53	52	74
Aplnr	ENSRNOG00000009227	protein_coding	33.6129	6.59923	1.79482	3.67681	0.000236167	0.00763794	0	2	0	8	49	146
Galnt13	ENSRNOG00000005335	protein_coding	207.821	0.676183	0.183874	3.67742	0.000235604	0.00763794	159	129	185	302	247	239
Rgma	ENSRNOG00000012874	protein_coding	5.33819	5.83356	1.59208	3.66411	0.000248201	0.00795793	0	0	0	4	6	23
Tbx2	ENSRNOG00000003517	protein_coding	118.348	0.906353	0.247584	3.66079	0.000251443	0.00801011	65	97	81	205	141	132
Ttyh2	ENSRNOG00000024578	protein_coding	252.771	0.559359	0.152782	3.66115	0.000251086	0.00801011	195	191	217	351	274	305
Mgmt	ENSRNOG00000016038	protein_coding	10.2927	3.87609	1.06138	3.65193	0.00026028	0.00825626	0	0	4	11	18	30
Tp53i3	ENSRNOG00000005177	protein_coding	246.093	0.605225	0.166125	3.64319	0.000269279	0.00850545	157	190	232	320	295	298
Prkcb	ENSRNOG00000012061	protein_coding	27.4086	1.92664	0.529349	3.63964	0.000273024	0.00860546	13	4	17	64	39	32
Crip2	ENSRNOG00000005041	protein_coding	2431.83	0.465394	0.127971	3.63672	0.000276131	0.008685	1519	2320	2211	3174	2688	2827
Tspan2	ENSRNOG00000023338	protein_coding	1296.2	0.579218	0.159359	3.63468	0.000278322	0.00873544	1168	771	1121	2009	1304	1510
Pclo	ENSRNOG00000005726	protein_coding	132.326	0.864441	0.238904	3.61835	0.000296483	0.00924691	105	63	109	200	160	167
Grin1	ENSRNOG00000011726	protein_coding	222.816	0.80855	0.224435	3.60261	0.00031504	0.00980513	174	169	130	366	284	224
Rbpms	ENSRNOG00000013328	protein_coding	337.989	0.659385	0.183069	3.60185	0.000315966	0.00981341	230	282	260	362	379	530
Rhpn1	ENSRNOG00000007597	protein_coding	139.072	0.798883	0.221986	3.5988	0.000319689	0.00990836	71	115	115	192	176	175
Prag1	ENSRNOG00000011407	protein_coding	491.575	0.565675	0.157449	3.59275	0.000327212	0.0100994	303	461	407	588	569	645
Socs2	ENSRNOG00000008965	protein_coding	829.214	0.355816	0.0992472	3.58515	0.000336886	0.0103765	679	690	778	1027	861	982
G0s2	ENSRNOG00000006019	protein_coding	8.51554	4.61802	1.28898	3.58269	0.000340069	0.0104099	0	0	2	10	23	16
Herc3	ENSRNOG00000007304	protein_coding	328.789	0.498969	0.139652	3.57294	0.000352998	0.0107394	263	246	295	416	369	400
F11r	ENSRNOG00000004414	protein_coding	2674.99	0.36987	0.103584	3.57072	0.000356006	0.0108088	2109	2272	2512	3013	2694	3586
Olfml2a	ENSRNOG00000014034	protein_coding	385.278	0.59598	0.16714	3.56575	0.000362816	0.0109931	277	313	314	404	484	528
Akap2	ENSRNOG00000011504	protein_coding	38.0147	1.44096	0.404524	3.56212	0.000367876	0.0111238	18	27	15	70	41	62
Dock9	ENSRNOG00000011969	protein_coding	1740.57	0.37017	0.103956	3.56084	0.00036967	0.0111553	1368	1430	1693	2071	1681	2312
Lpin1	ENSRNOG00000004377	protein_coding	1187.57	0.391498	0.110272	3.55031	0.000384784	0.0115412	892	939	1215	1472	1342	1328
Cxcl12	ENSRNOG00000013589	protein_coding	241.81	0.624297	0.175882	3.54952	0.000385932	0.0115523	187	160	215	280	286	334
Garnl3	ENSRNOG00000057044	protein_coding	185.336	0.785348	0.221484	3.54585	0.000391349	0.0116909	99	135	171	206	222	292
Ugt8	ENSRNOG00000009345	protein_coding	45.2755	1.41971	0.400547	3.54442	0.000393477	0.0117295	33	18	21	97	56	52
St3gal6	ENSRNOG00000001653	protein_coding	95.5081	0.867182	0.244695	3.54393	0.000394217	0.0117295	69	52	79	139	111	131
Sik3	ENSRNOG00000045931	protein_coding	1286.37	0.33289	0.0939608	3.54286	0.000395812	0.0117535	1008	1111	1246	1528	1383	1500
Zfp575	ENSRNOG00000024065	protein_coding	5.43449	5.84853	1.65529	3.53322	0.000410524	0.0121661	0	0	0	3	24	4
AC141959.1	ENSRNOG00000028545	protein_coding	397.791	0.490031	0.139049	3.52416	0.00042482	0.0125398	295	358	321	516	441	474
Epb42	ENSRNOG00000011649	protein_coding	74.7542	1.18477	0.337381	3.51168	0.000445286	0.0130661	30	49	57	82	85	153
Nrbp1	ENSRNOG00000050570	protein_coding	1207.83	0.344367	0.0980548	3.51199	0.000444767	0.0130661	901	1060	1189	1479	1272	1412
Ppfibp1	ENSRNOG00000031709	protein_coding	2402.54	0.426669	0.122008	3.49707	0.000470406	0.013722	1924	1877	2254	2536	2596	3326
Dkk2	ENSRNOG00000011360	protein_coding	8.42327	3.51968	1.01127	3.48045	0.000500574	0.0144843	2	0	2	20	14	14
Slc9a3r1	ENSRNOG00000003232	protein_coding	1188.22	0.562486	0.161622	3.48026	0.000500932	0.0144843	709	1167	957	1339	1413	1589
Acer2	ENSRNOG00000007637	protein_coding	76.8478	1.16005	0.333864	3.47461	0.00051159	0.0147499	58	37	44	77	104	143
Tafa5	ENSRNOG00000049349	protein_coding	20.8604	2.49136	0.718407	3.46789	0.000524558	0.0150945	14	2	2	56	32	22
Ehbp1	ENSRNOG00000008917	protein_coding	703.59	0.440545	0.127147	3.46486	0.000530505	0.0152068	538	560	667	775	781	931
Klhdc10	ENSRNOG00000010267	protein_coding	4726.55	0.356449	0.103042	3.45927	0.000541636	0.0154662	3726	3999	4526	5250	4751	6348
Col2a1	ENSRNOG00000058560	protein_coding	79.0742	1.0702	0.310121	3.4509	0.000558711	0.0158928	50	52	48	156	101	75
Rhpn2	ENSRNOG00000011885	protein_coding	361.75	0.532413	0.154509	3.44585	0.000569274	0.016145	282	298	290	411	395	509
Gipc2	ENSRNOG00000042152	protein_coding	399.758	0.467062	0.135552	3.44562	0.000569748	0.016145	337	291	362	525	412	496
Alpk1	ENSRNOG00000022636	protein_coding	235.24	0.602875	0.175165	3.44176	0.000577937	0.0163459	194	173	182	350	264	262
Tns1	ENSRNOG00000014182	protein_coding	2550.45	0.41734	0.121447	3.43641	0.000589476	0.016558	1718	2492	2241	3088	2817	3063
Grina	ENSRNOG00000029941	protein_coding	12777.4	0.401606	0.116847	3.43702	0.000588146	0.016558	9210	12052	11227	13970	13775	16925
Vldlr	ENSRNOG00000027491	protein_coding	4524.6	0.563985	0.164154	3.4357	0.000591016	0.0165585	2696	3959	4183	4506	5104	6930
Ryr2	ENSRNOG00000017060	protein_coding	221.053	0.621981	0.181111	3.43425	0.000594194	0.016585	169	137	210	322	232	276
Scara3	ENSRNOG00000016177	protein_coding	9.12218	3.69125	1.07653	3.42883	0.000606179	0.0168879	0	0	4	22	20	10
Glis2	ENSRNOG00000004766	protein_coding	881.6	0.416132	0.121455	3.42621	0.000612059	0.0169564	678	825	719	1182	929	1000
Tox2	ENSRNOG00000008146	protein_coding	66.7772	1.08069	0.316045	3.41941	0.000627561	0.0172391	44	51	30	101	93	84
Cyp2s1	ENSRNOG00000020743	protein_coding	375.775	0.49394	0.144586	3.41623	0.00063495	0.0173643	300	289	331	489	452	408
Stmn3	ENSRNOG00000013657	protein_coding	494.536	0.519334	0.152256	3.41092	0.000647432	0.0176085	341	449	409	732	547	521
Tkt	ENSRNOG00000016064	protein_coding	6106.77	0.418787	0.123003	3.40469	0.000662403	0.01795	4040	6097	5298	7651	6565	7306
Eif2b2	ENSRNOG00000006467	protein_coding	2222.58	0.273616	0.0806066	3.39446	0.000687641	0.0186001	1857	1951	2130	2637	2257	2602
Dsp	ENSRNOG00000013928	protein_coding	3534.05	0.338522	0.0998226	3.39123	0.000695789	0.0187184	2902	2879	3442	3992	3524	4648
Padi4	ENSRNOG00000006855	protein_coding	3.91602	5.38452	1.5901	3.38628	0.000708467	0.0189907	0	0	0	8	8	8
Tspan15	ENSRNOG00000046204	protein_coding	129.212	0.717078	0.211799	3.38566	0.000710073	0.0189974	80	104	105	169	141	186
Cd302	ENSRNOG00000006623	protein_coding	13.3466	2.5042	0.740682	3.38094	0.000722372	0.0192594	2	4	6	32	10	30
Mical3	ENSRNOG00000053203	protein_coding	359.966	0.490605	0.14521	3.37859	0.000728595	0.0193905	237	311	339	458	380	460
Ppp1r3b	ENSRNOG00000011474	protein_coding	249.942	0.566041	0.167706	3.37519	0.000737653	0.0195965	192	189	213	283	300	331
Git1	ENSRNOG00000061270	protein_coding	3499.59	0.356876	0.105792	3.37339	0.000742495	0.01969	2586	3398	3064	4242	3769	4081
Dnmt3a	ENSRNOG00000026649	protein_coding	657.111	0.54556	0.1619	3.36973	0.000752411	0.0199175	395	656	526	828	754	816
Sned1	ENSRNOG00000023548	protein_coding	126.575	0.741523	0.220139	3.36844	0.000755961	0.0199759	89	83	108	148	154	184
Slc24a3	ENSRNOG00000060687	protein_coding	275.565	0.742001	0.220366	3.36713	0.000759539	0.0200349	152	241	217	293	300	468
Dap	ENSRNOG00000010747	protein_coding	3614.44	0.35072	0.104196	3.36597	0.000762748	0.0200839	2664	3256	3479	4039	3768	4656
Cdh15	ENSRNOG00000027954	protein_coding	229.346	0.733415	0.217946	3.36512	0.000765099	0.0201102	123	223	162	351	272	261
Il17re	ENSRNOG00000009204	protein_coding	63.6094	1.02745	0.305922	3.35852	0.000783598	0.0205601	28	50	46	88	86	88
Podxl	ENSRNOG00000012495	protein_coding	217.623	0.555734	0.165565	3.35659	0.000789114	0.0206479	173	158	189	307	229	265
Bzw2	ENSRNOG00000005096	protein_coding	921.65	0.37071	0.110449	3.35637	0.00078972	0.0206479	749	726	902	1123	897	1192
Rbm24	ENSRNOG00000046547	protein_coding	12.6997	3.07408	0.918532	3.34673	0.000817718	0.0211937	0	6	2	45	8	20
Papss2	ENSRNOG00000011068	protein_coding	85.0254	0.850234	0.253999	3.34739	0.000815763	0.0211937	55	50	75	128	100	110
Zbtb7c	ENSRNOG00000047924	protein_coding	151.226	0.658273	0.196686	3.34682	0.000817454	0.0211937	93	127	127	207	172	192
Rd3l	ENSRNOG00000043031	protein_coding	47.8274	1.14571	0.342936	3.34088	0.000835146	0.0216078	23	32	33	62	73	66
Klhl32	ENSRNOG00000007441	protein_coding	51.3971	1.24285	0.374244	3.32096	0.000897099	0.0230902	27	31	32	48	74	98
Bnc2	ENSRNOG00000006553	protein_coding	166.822	0.7425	0.223554	3.32135	0.00089584	0.0230902	103	141	124	185	187	270
Ncam1	ENSRNOG00000031890	protein_coding	2650.17	0.309998	0.0934807	3.31618	0.00091258	0.0234077	2176	2176	2645	3389	2843	2804
Dgkz	ENSRNOG00000017737	protein_coding	7112.58	0.378122	0.114069	3.31485	0.000916927	0.0234787	5211	6984	6027	8492	8030	8156
Colec11	ENSRNOG00000008373	protein_coding	22.473	1.7905	0.540698	3.31146	0.000928095	0.0236831	8	8	14	46	40	21
Dysf	ENSRNOG00000032788	protein_coding	54.9513	1.02702	0.310384	3.30886	0.000936768	0.0238635	32	34	41	72	67	88
Tbc1d21	ENSRNOG00000008737	protein_coding	3.80727	5.34967	1.62048	3.30129	0.000962402	0.0244081	0	0	0	10	4	10
Itgb4	ENSRNOG00000005580	protein_coding	477.608	0.426255	0.129149	3.30048	0.00096518	0.0244081	408	359	435	630	473	591
Plekha2	ENSRNOG00000038365	protein_coding	611.149	0.373028	0.113034	3.30014	0.00096635	0.0244081	495	489	590	804	630	696
Paqr6	ENSRNOG00000026059	protein_coding	19.3145	1.76133	0.534272	3.29669	0.000978298	0.0245847	7	9	10	28	33	30
Ca9	ENSRNOG00000017073	protein_coding	24.2182	1.60111	0.485662	3.29676	0.000978054	0.0245847	14	13	8	37	33	42
Gab1	ENSRNOG00000017879	protein_coding	548.259	0.39736	0.120705	3.292	0.000994783	0.0248729	435	442	521	637	591	689
Slc24a4	ENSRNOG00000006729	protein_coding	128.842	0.675033	0.205196	3.28969	0.00100296	0.0249793	88	98	107	162	153	172
Ripk3	ENSRNOG00000020465	protein_coding	506.729	0.393918	0.11973	3.29005	0.00100168	0.0249793	415	435	440	656	516	605
Ecm1	ENSRNOG00000021166	protein_coding	1422.03	0.383462	0.116592	3.28893	0.00100571	0.0249793	1077	1262	1305	1901	1609	1444
Gulp1	ENSRNOG00000003242	protein_coding	7.65269	4.39353	1.3377	3.28439	0.00102203	0.0251734	2	0	0	6	23	14
Slc19a2	ENSRNOG00000002839	protein_coding	612.058	0.513955	0.15661	3.28174	0.00103167	0.0253689	482	461	545	657	626	934
Patz1	ENSRNOG00000018709	protein_coding	2254.04	0.362396	0.11049	3.27991	0.0010384	0.0254922	1650	2158	2012	2605	2373	2824
Spon1	ENSRNOG00000058003	protein_coding	4838.33	0.438428	0.134093	3.26958	0.00107708	0.0263116	2986	4592	4610	6192	5631	5278
Gli1	ENSRNOG00000025120	protein_coding	162.589	0.635274	0.194554	3.26528	0.00109356	0.0266704	109	132	135	226	201	181
Kctd14	ENSRNOG00000012494	protein_coding	187.985	0.593439	0.182118	3.25855	0.00111983	0.0272294	141	152	148	258	227	210
Fryl	ENSRNOG00000002248	protein_coding	795.617	0.343039	0.105505	3.25141	0.00114836	0.0278697	642	652	780	1048	801	901
Cacna2d1	ENSRNOG00000033531	protein_coding	2198.61	0.446034	0.137208	3.25079	0.00115085	0.0278847	1810	1642	2043	2220	2457	3091
Amer1	ENSRNOG00000007984	protein_coding	279.988	0.624749	0.192281	3.24914	0.00115756	0.0279961	200	217	233	289	309	445
Cyp27a1	ENSRNOG00000017188	protein_coding	151.797	0.681368	0.209781	3.248	0.00116221	0.028023	129	101	112	196	192	185
Chsy3	ENSRNOG00000050152	protein_coding	85.7414	0.823825	0.254066	3.24256	0.00118462	0.0283794	49	57	78	117	101	120
LOC690507	ENSRNOG00000015637	protein_coding	6.79401	4.28763	1.3267	3.2318	0.00123015	0.0294228	0	0	2	10	10	20
Pdlim2	ENSRNOG00000008543	protein_coding	218.246	0.622794	0.192795	3.23035	0.0012364	0.0295247	143	172	194	349	247	223
Gstp1	ENSRNOG00000018237	protein_coding	10374.7	0.312198	0.0967323	3.22744	0.00124903	0.029749	9490	8751	8940	13493	10157	11894
Mdk	ENSRNOG00000017560	protein_coding	58.2414	1.15722	0.359238	3.22132	0.00127602	0.0301323	34	38	34	59	68	120
Il33	ENSRNOG00000016456	protein_coding	76.7921	1.00316	0.31136	3.22188	0.00127353	0.0301323	46	40	66	147	95	76
Mylk	ENSRNOG00000002215	protein_coding	401.096	0.512248	0.159013	3.22142	0.00127556	0.0301323	257	359	363	482	406	568
Kifc3	ENSRNOG00000014087	protein_coding	613.247	0.619962	0.19261	3.21875	0.0012875	0.0303072	339	589	502	642	799	824
Fam102a	ENSRNOG00000050834	protein_coding	754.263	0.342867	0.106626	3.21562	0.00130164	0.030574	596	661	706	888	803	904
Ambra1	ENSRNOG00000017422	protein_coding	3028.51	0.248204	0.0771938	3.21533	0.00130295	0.030574	2511	2631	3040	3628	3094	3409
Ifitm1	ENSRNOG00000004273	protein_coding	37.6714	1.44094	0.448243	3.21465	0.00130605	0.0305987	14	24	22	34	53	81
Il18r1	ENSRNOG00000015027	protein_coding	90.0902	0.798845	0.249019	3.20797	0.00133677	0.0311711	61	55	79	141	96	118
Arhgef7	ENSRNOG00000012934	protein_coding	2146.42	0.286146	0.0893399	3.20289	0.00136055	0.0316548	1695	1981	2034	2521	2186	2559
AABR07028769.1	ENSRNOG00000016670	protein_coding	632.325	0.428223	0.134277	3.18909	0.0014272	0.0330724	558	483	545	753	629	857
Maob	ENSRNOG00000029778	protein_coding	3.90368	5.37385	1.68586	3.18761	0.00143454	0.0331907	0	0	0	2	12	9
Crocc	ENSRNOG00000008334	protein_coding	88.3172	0.994252	0.312583	3.18076	0.00146889	0.03388	37	83	54	106	125	128
Tcea3	ENSRNOG00000011794	protein_coding	55.9427	1.1594	0.364589	3.18001	0.00147272	0.0339158	25	43	34	55	83	97
Ca12	ENSRNOG00000017766	protein_coding	873.718	0.375952	0.118314	3.17759	0.00148506	0.0340332	790	646	804	1085	927	1028
Lipa	ENSRNOG00000019077	protein_coding	2679.93	0.395431	0.124625	3.17297	0.00150886	0.0344813	2455	1924	2436	3409	2483	3544
Lgi3	ENSRNOG00000011323	protein_coding	42.981	1.37705	0.434128	3.17198	0.00151403	0.0345463	30	27	12	61	76	51
Gng4	ENSRNOG00000047080	protein_coding	53.6747	1.14507	0.362398	3.1597	0.0015793	0.0356529	44	21	33	99	66	64
Tmem229b	ENSRNOG00000010646	protein_coding	1059.53	0.330013	0.104419	3.16046	0.0015752	0.0356529	926	895	942	1383	1086	1174
Rxylt1	ENSRNOG00000004421	protein_coding	562.481	0.386851	0.122522	3.1574	0.00159183	0.0358813	453	456	531	673	556	739
Adamts19	ENSRNOG00000019577	protein_coding	10.8357	2.41629	0.766026	3.15432	0.00160873	0.036165	4	4	2	23	12	22
Spry1	ENSRNOG00000025371	protein_coding	37.5596	1.25042	0.396428	3.15422	0.00160928	0.036165	22	16	28	75	42	48
Ldha	ENSRNOG00000013009	protein_coding	20321.3	0.289351	0.0920437	3.14362	0.00166871	0.0373876	16600	17248	20222	22113	21117	25466
Doc2b	ENSRNOG00000060054	protein_coding	503.234	0.581975	0.185193	3.14254	0.0016749	0.0374698	477	312	392	670	644	534
Tent5c	ENSRNOG00000015222	protein_coding	33.4181	1.61469	0.515515	3.13218	0.00173515	0.0386434	16	10	23	33	33	90
Fgfr4	ENSRNOG00000016763	protein_coding	49.0854	1.08844	0.347661	3.13076	0.00174356	0.0387149	35	31	26	89	50	69
Mitf	ENSRNOG00000008658	protein_coding	26.3212	1.6313	0.521527	3.12793	0.00176043	0.0390312	6	20	12	35	31	57
Arrdc4	ENSRNOG00000010775	protein_coding	363.352	0.602923	0.19282	3.12687	0.00176678	0.0391136	319	204	328	410	417	518
Otogl	ENSRNOG00000030316	protein_coding	32.268	1.36863	0.438054	3.12434	0.00178204	0.0393523	10	18	26	53	34	58
Tmem176b	ENSRNOG00000008465	protein_coding	1251.25	0.379646	0.121659	3.12057	0.00180504	0.0397241	926	1074	1219	1359	1308	1684
Adgrb2	ENSRNOG00000014375	protein_coding	651.144	0.606399	0.194554	3.11687	0.00182779	0.0401063	350	679	495	779	713	928
Dcakd	ENSRNOG00000021682	protein_coding	1368.36	0.37874	0.1215	3.1172	0.0018258	0.0401063	928	1313	1279	1672	1507	1578
Itpr2	ENSRNOG00000001804	protein_coding	169.149	0.661989	0.212536	3.11471	0.00184123	0.0403416	132	117	137	193	176	270
Lepr	ENSRNOG00000023664	protein_coding	9.35313	2.54754	0.818547	3.11227	0.00185652	0.0404512	3	3	2	15	15	19
P2rx2	ENSRNOG00000037456	protein_coding	2265.96	0.531196	0.17065	3.11279	0.00185331	0.0404512	1983	1482	1995	3839	2344	2145
Ets2	ENSRNOG00000001647	protein_coding	1780.88	0.431071	0.138511	3.11218	0.00185711	0.0404512	1219	1709	1550	1913	1937	2428
Tnni3	ENSRNOG00000018250	protein_coding	21.3728	1.64319	0.528814	3.10731	0.00188797	0.0409437	5	12	14	44	26	31
Mfap3l	ENSRNOG00000011775	protein_coding	240.024	0.516099	0.16681	3.09392	0.00197529	0.0426507	168	190	227	283	259	328
Cyp2e1	ENSRNOG00000012458	protein_coding	717.138	0.60673	0.196292	3.09095	0.00199515	0.0430173	635	439	598	716	770	1173
Ezr	ENSRNOG00000018524	protein_coding	4581.62	0.293083	0.0949045	3.08819	0.0020138	0.0432312	3582	4188	4394	5127	4636	5770
Cldn4	ENSRNOG00000001476	protein_coding	270.545	0.519574	0.168305	3.0871	0.00202117	0.0432807	197	251	206	381	279	326
Nrp1	ENSRNOG00000010744	protein_coding	3599.44	0.28067	0.0909201	3.08699	0.00202192	0.0432807	3122	2969	3500	4061	3661	4432
Marcks	ENSRNOG00000000579	protein_coding	7.18128	3.23242	1.04961	3.07963	0.00207261	0.0441118	2	2	0	16	12	12
AABR07064980.1	ENSRNOG00000055777	protein_coding	13.3586	1.9801	0.643186	3.07858	0.00207992	0.0441936	4	6	6	24	18	24
Tjp2	ENSRNOG00000015030	protein_coding	2927.91	0.300478	0.0976142	3.07822	0.00208239	0.0441936	2298	2630	2826	3443	2773	3770
Dnmbp	ENSRNOG00000050742	protein_coding	449.135	0.384551	0.124984	3.07681	0.00209228	0.0443403	350	385	415	532	490	542
Mcoln3	ENSRNOG00000015024	protein_coding	3.9371	5.39229	1.75374	3.07473	0.00210691	0.0445235	0	0	0	1	6	17
Mesp1	ENSRNOG00000014951	protein_coding	14.0509	2.05632	0.670593	3.06643	0.00216632	0.0455846	6	4	6	17	31	20
Galnt9	ENSRNOG00000037476	protein_coding	154.725	0.852166	0.278298	3.06206	0.00219817	0.0461896	79	154	91	248	209	155
Efnb1	ENSRNOG00000006877	protein_coding	838.137	0.438712	0.143562	3.0559	0.00224385	0.0468844	547	838	716	1021	931	1014
Phlda1	ENSRNOG00000004019	protein_coding	74.7051	0.853127	0.279869	3.04831	0.00230132	0.0477581	47	45	66	121	93	83
Dmd	ENSRNOG00000046366	protein_coding	603.157	0.453803	0.148873	3.04826	0.00230171	0.0477581	562	430	503	867	604	689
Tpm2	ENSRNOG00000016731	protein_coding	38.6832	1.25603	0.412381	3.0458	0.00232064	0.0480838	16	24	28	86	41	44
Fzd7	ENSRNOG00000016119	protein_coding	646.131	0.481191	0.158224	3.04119	0.00235643	0.0486897	428	655	505	770	721	823
Crabp2	ENSRNOG00000048421	protein_coding	20.6375	1.63435	0.538047	3.03755	0.00238507	0.0490844	7	8	15	31	38	26
Crabp2	ENSRNOG00000022101	protein_coding	20.6375	1.63435	0.538047	3.03755	0.00238507	0.0490844	7	8	15	31	38	26
Vegfa	ENSRNOG00000019598	protein_coding	1408.02	0.375517	0.123671	3.03643	0.00239397	0.0491921	1166	1108	1345	1572	1725	1560
Adm	ENSRNOG00000027030	protein_coding	472.641	0.442763	0.145938	3.03392	0.00241395	0.0495342	404	353	424	684	507	492
